# Supplementary material
Source: PubMed Central journal article supplement (PMC6605052)
Supplement: NIHMS1031989-supplement-Supplementary_Figs.pdf [file NIHMS1031989-supplement-Supplementary_Figs.pdf]

In the format provided by the authors and unedited.

# Senolytic therapy alleviates A $\beta$ -associated oligodendrocyte progenitor cell senescence and cognitive deficits in an Alzheimer's disease model

Peisu Zhang <sup>1\*</sup>, Yuki Kishimoto<sup>1</sup>, Ioannis Grammatikakis<sup>2</sup>, Kamalvishnu Gottimukkala<sup>3</sup>, Roy G. Cutler<sup>1</sup>, Shiliang Zhang<sup>4</sup>, Kotb Abdelmohsen<sup>2</sup>, Vilhelm A. Bohr <sup>5</sup>, Jyoti Misra Sen<sup>3,6</sup>, Myriam Gorospe<sup>2</sup> and Mark P. Mattson <sup>1,7\*</sup>

---

<sup>1</sup>Laboratory of Neurosciences, National Institute on Aging Intramural Research Program, NIH, Baltimore, MD, USA. <sup>2</sup>Laboratory of Genetics and Genomics, National Institute on Aging Intramural Research Program, NIH, Baltimore, MD, USA. <sup>3</sup>Laboratory of Clinical Investigation, National Institute on Aging Intramural Research Program, NIH, Baltimore, MD, USA. <sup>4</sup>Electron Microscopy Core, National Institute on Drug Abuse Intramural Research Program, NIH, Baltimore, MD, USA. <sup>5</sup>Laboratory of Molecular Gerontology, National Institute on Aging Intramural Research Program, NIH, Baltimore, MD, USA. <sup>6</sup>Immunology Program, Department of Medicine, Johns Hopkins University School of Medicine, Baltimore, MD, USA. <sup>7</sup>Department of Neuroscience, Johns Hopkins University School of Medicine, Baltimore, MD, USA. \*e-mail: [zhangpei@mail.nih.gov](mailto:zhangpei@mail.nih.gov); [mark.mattson@nih.gov](mailto:mark.mattson@nih.gov)

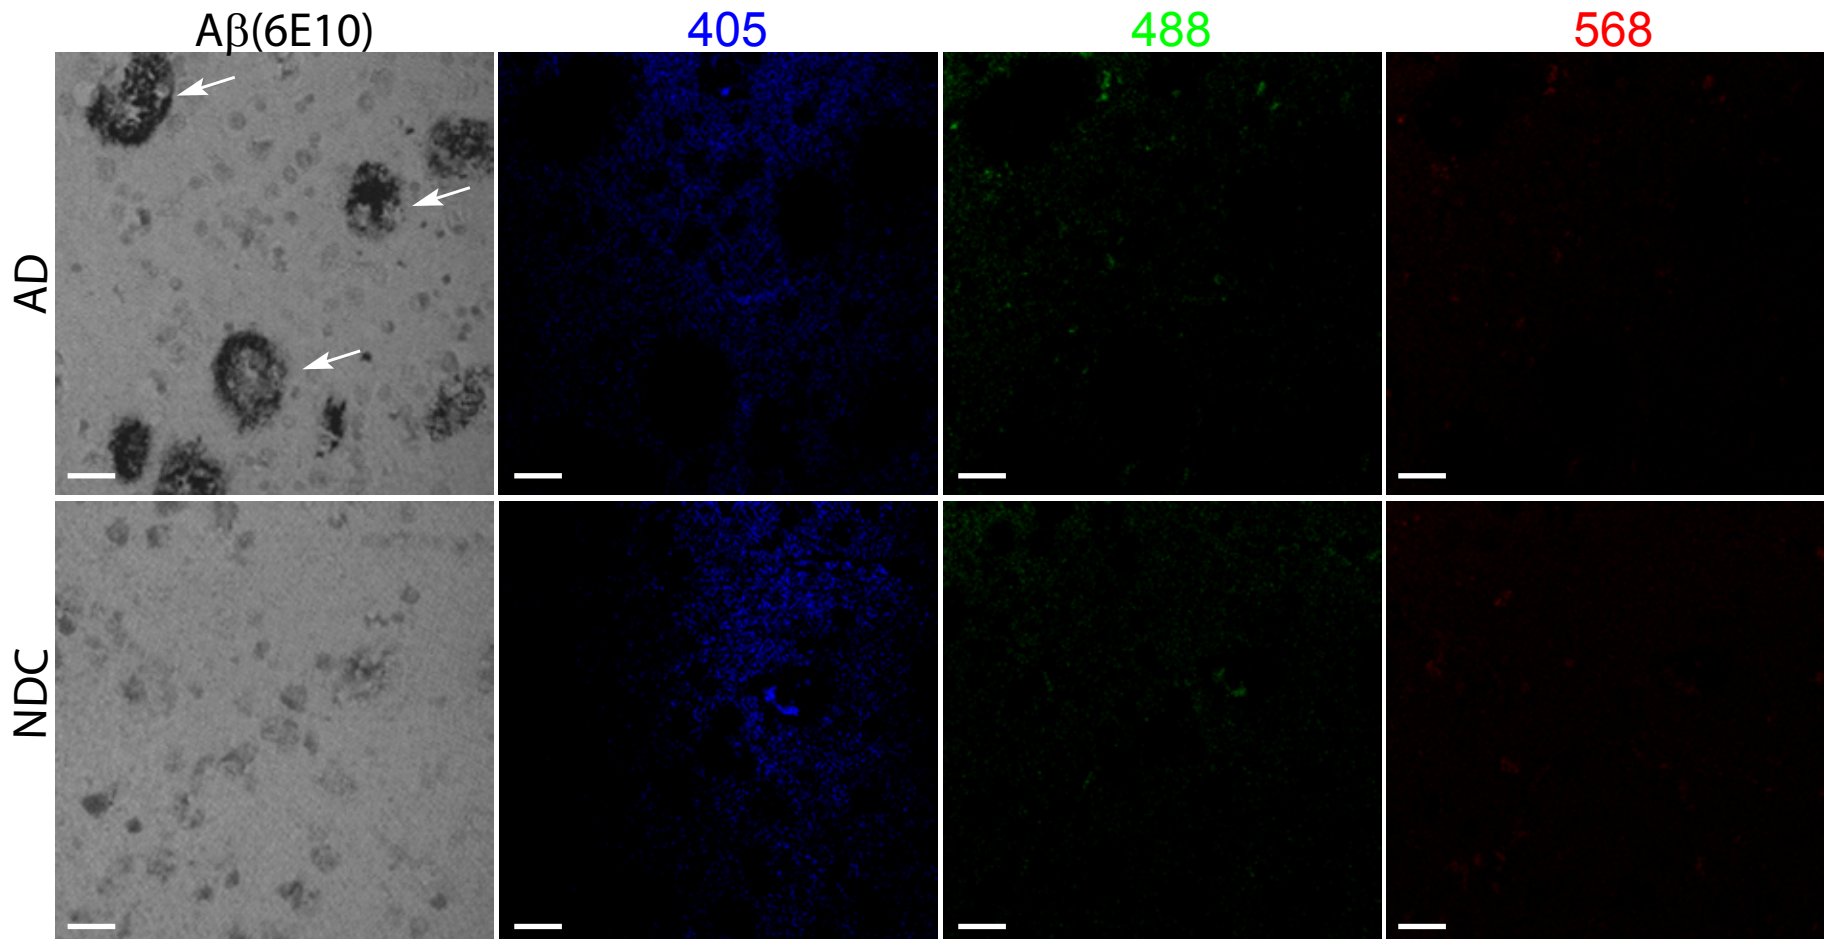

**Supplementary Figure 1.** Confocal images showing little or no autofluorescent signals present in a human AD brain as well as in a NDC control brain. Brain sections were immunostained with anti-A $\beta$  monoclonal antibody 6E10 and visualized using 3,3' diaminobenzidine (DAB) staining. The images on the left show A $\beta$ -immunoreactive plaques (arrows) visualized by differential interference contrast optics. The images on the right were acquired with excitation at the indicated wavelengths (405, 488 and 568 nm). The results represent 5 images per brain in each group. Scale bar = 20 $\mu$ m.

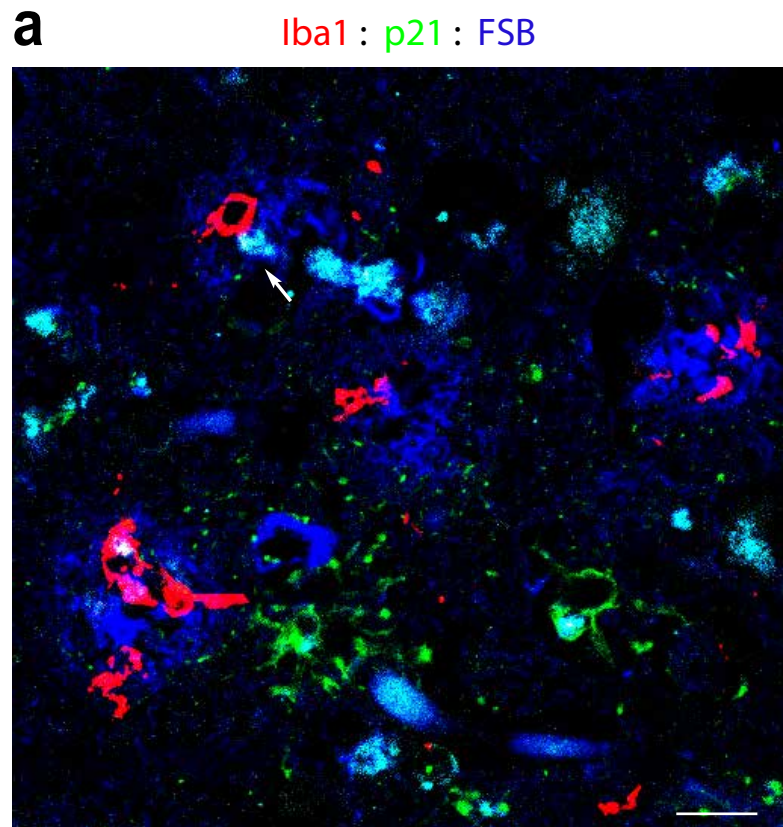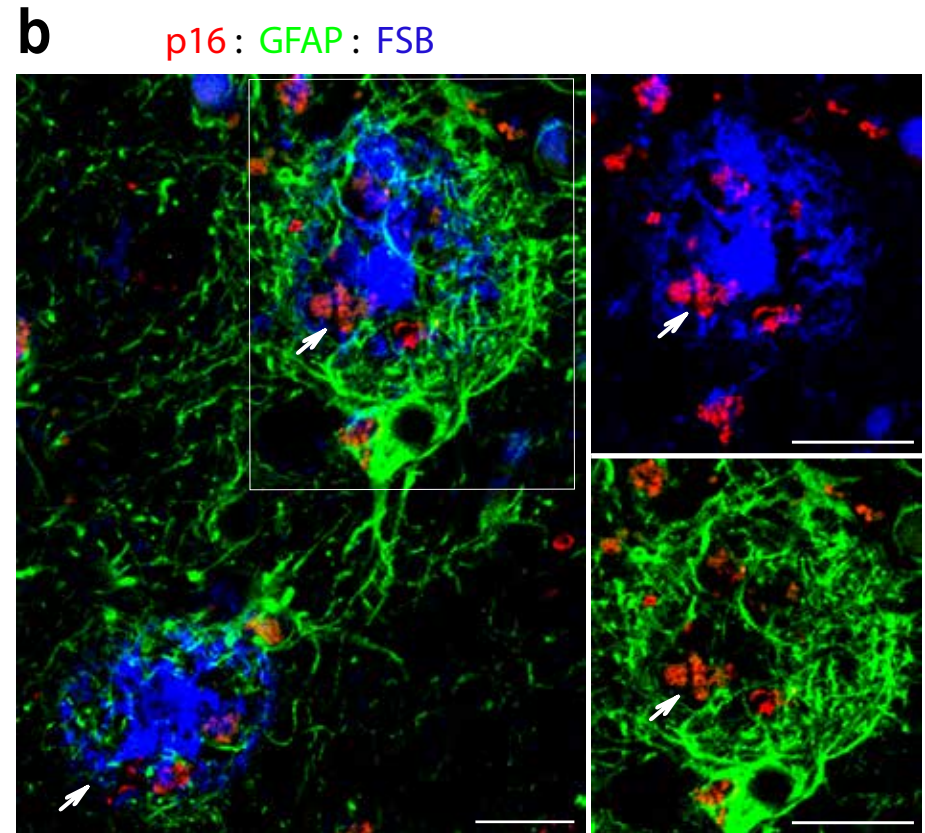

**Supplementary Figure 2.** Immunofluorescence images showing the locations of senescent cells, microglia and astrocytes in the A $\beta$  plaque environment in the inferior parietal cortex of AD patients. **(a)** Confocal images showing fibrillar A $\beta$  (blue; FSB staining), and immunostaining for the microglial marker Iba1 (red) and the cell senescence marker p21 (green). Microglia do not exhibit p21 immunoreactivity (arrows). **(b)** Confocal images showing fibrillar A $\beta$  (blue; FSB staining), and immunostaining for the astrocyte marker GFAP (green) and the senescent cell marker p16 (red). Arrows point to GFAP-negative cells exhibiting a senescence phenotype (p16 immunoreactivity). Scale bar = 20  $\mu$ m. The results in a and b represent more than 10 images from two human AD brains per group.

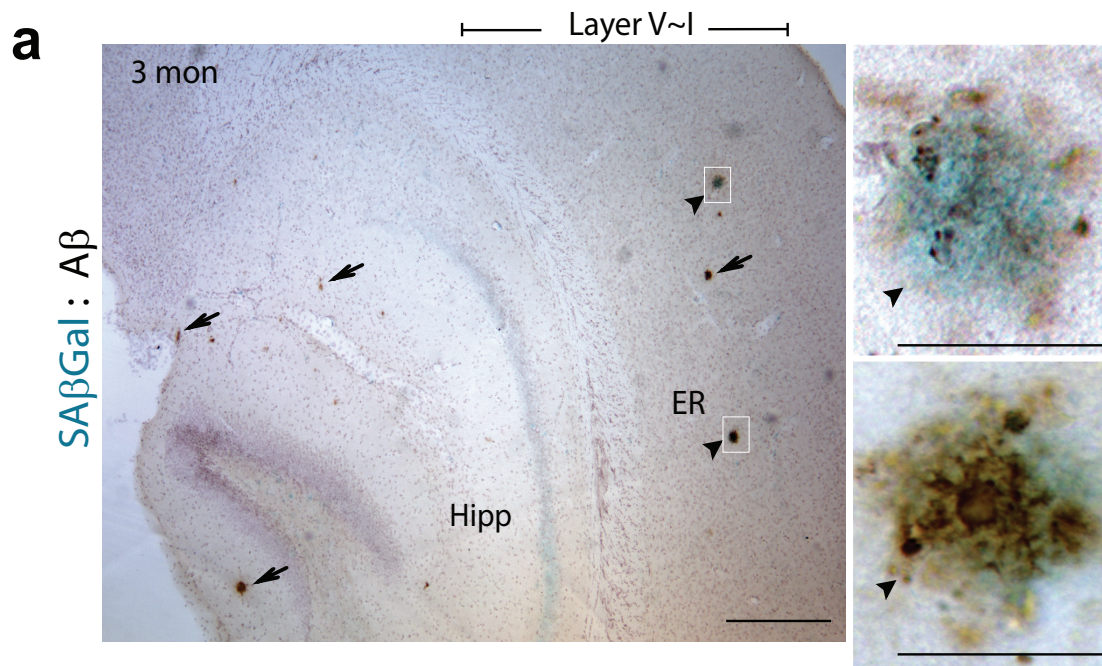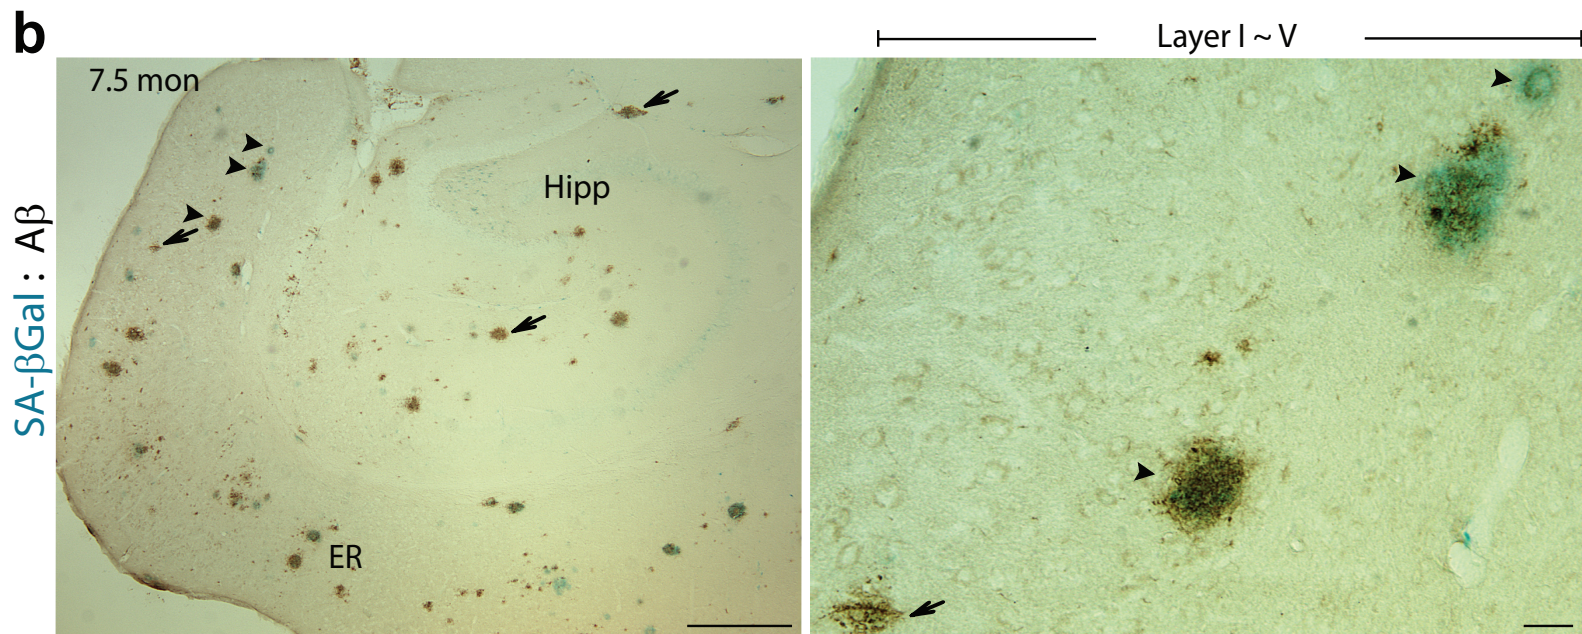

**Supplementary Figure 3.** Association of cellular senescence with A $\beta$  plaques in the brains of APP/PS1 double mutant transgenic mice. Brain sections from a 3-month-old (a) and 7.5-month-old (b) APP/PS1 mutant transgenic mouse were stained for A $\beta$  (brown) and SA- $\beta$ Gal (blue), with (a) and without (b) cresyl violet counterstaining. Arrows and arrowheads point to the variation in sizes of A $\beta$  deposits between different ages and their uneven distributions over SA- $\beta$ Gal foci. Note the paucity of A $\beta$  deposits in the 3-month-old mouse. Right panels are high magnifications of boxed areas in left panels. Hipp, hippocampus; EC, entorhinal cortex. Scale bar: left panels = 100 $\mu$ m ; right panels = 20 $\mu$ m. Images represent three sections per mice, and three mice for each group. The statistic results are shown in Figure 4d.

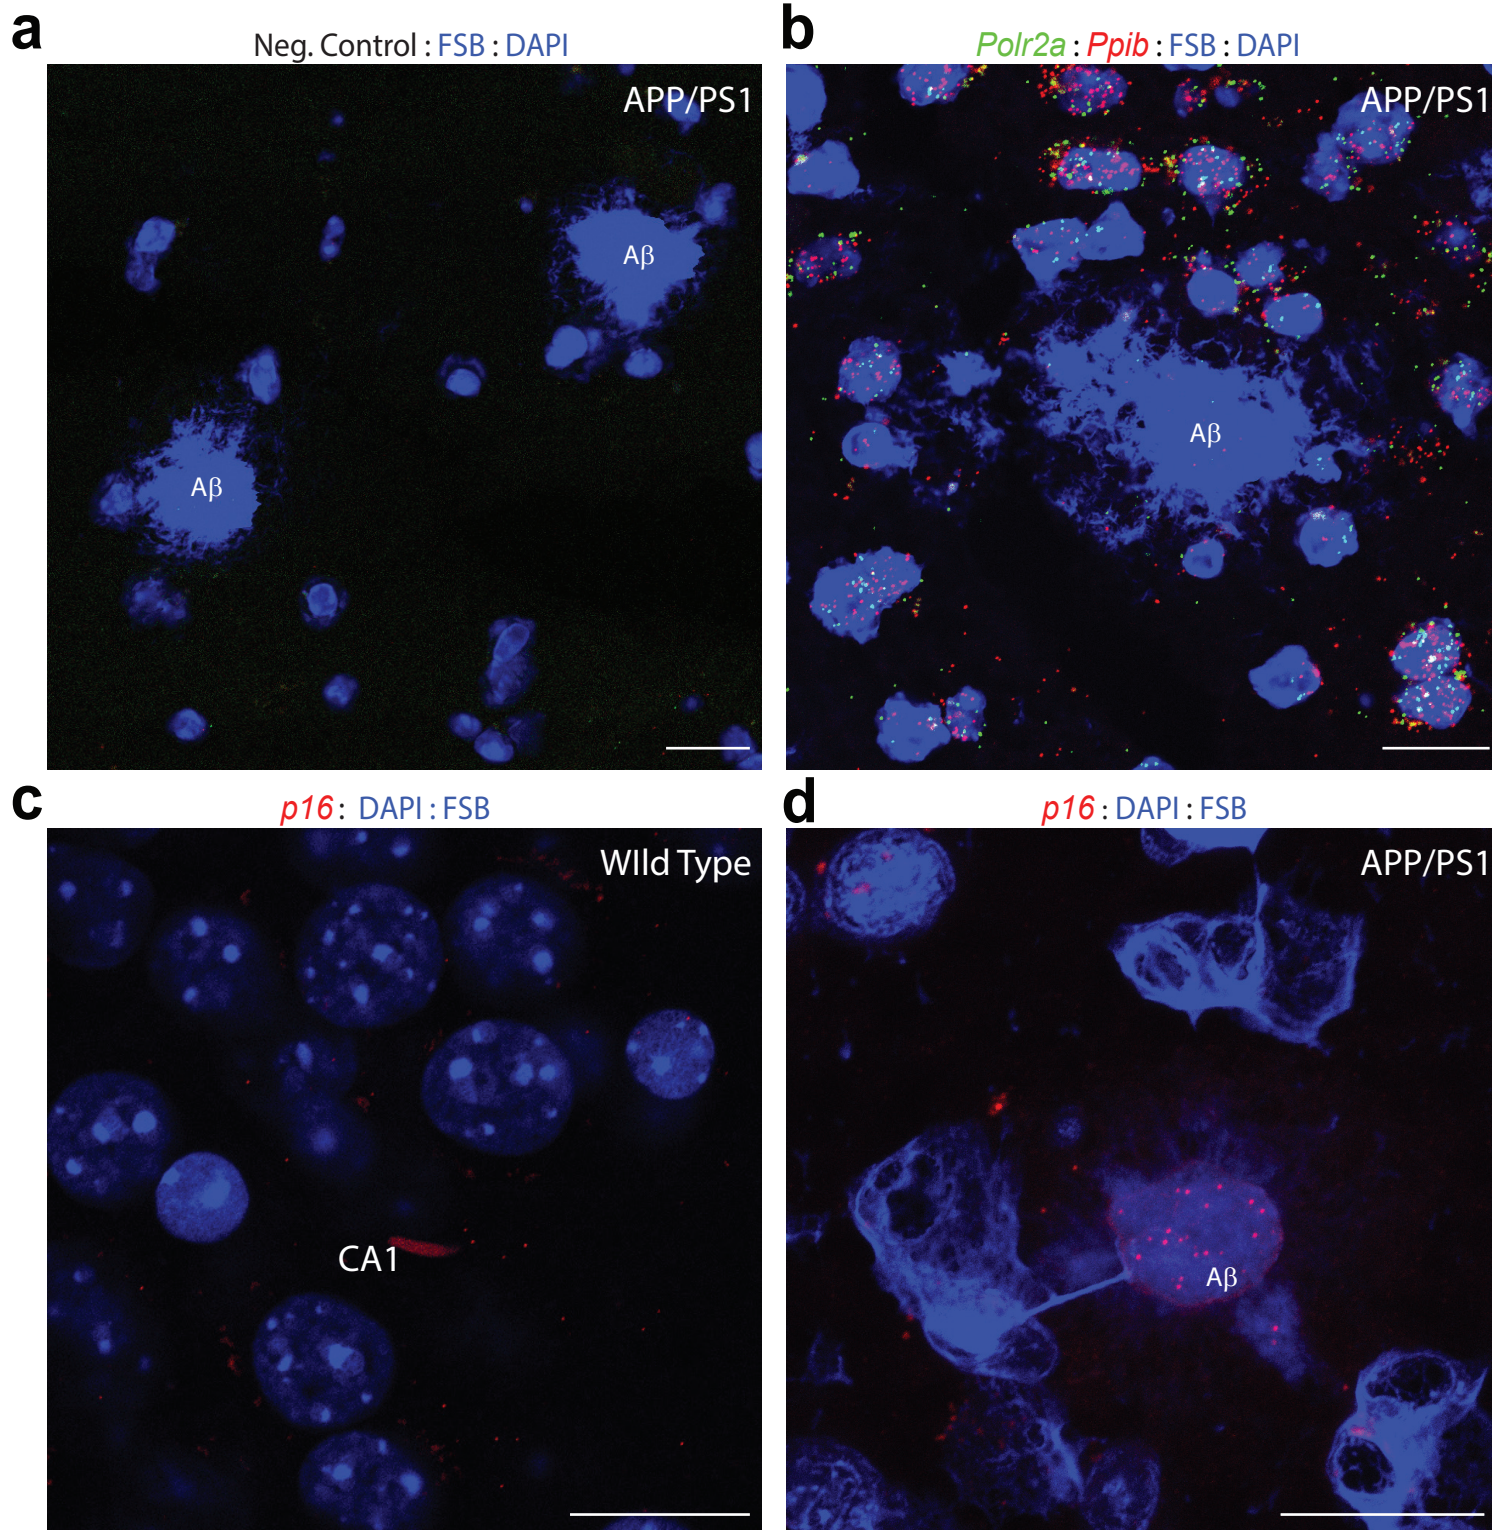

**Supplementary Figure 4.** RNAscope fluorescence in situ hybridization (ISH) using brain sections from 8-month-old APP/PS1 transgenic and wild type mice. **(a)** Confocal image showing no RNA signal was detected in the negative control using a probe against bacterial gene *DapB*. The 10  $\mu$ m section from an APP/PS1 mouse brain was counterstained with FSB and DAPI to label A $\beta$  plaques and nuclei, respectively. **(b)** An adjacent section was hybridized with the RNAscope probes against the murine housekeeping gene *Polr2a* (green) and *Ppib* (red) as positive controls. The RNA puncta were readily detectable in the regions devoid of A $\beta$  plaques. **(c)** A section of age-matched wild type brain was hybridized with the target-specific probe against *p16* transcript as a control. The image showing a sparse distribution of *p16* RNA near the nuclei of CA1 neurons. **(d)** Image showing numerous copies of *p16* transcripts concentrated in cells associated with a FSB-labeled A $\beta$  plaque, but distributed sparsely in the regions devoid of A $\beta$  plaques. Scale bar = 20  $\mu$ m in each panel. The results in a, b and c represent 5-8 images per group in two independent replicates per group. The statistic analysis and replica in d are shown in Figure 2e.

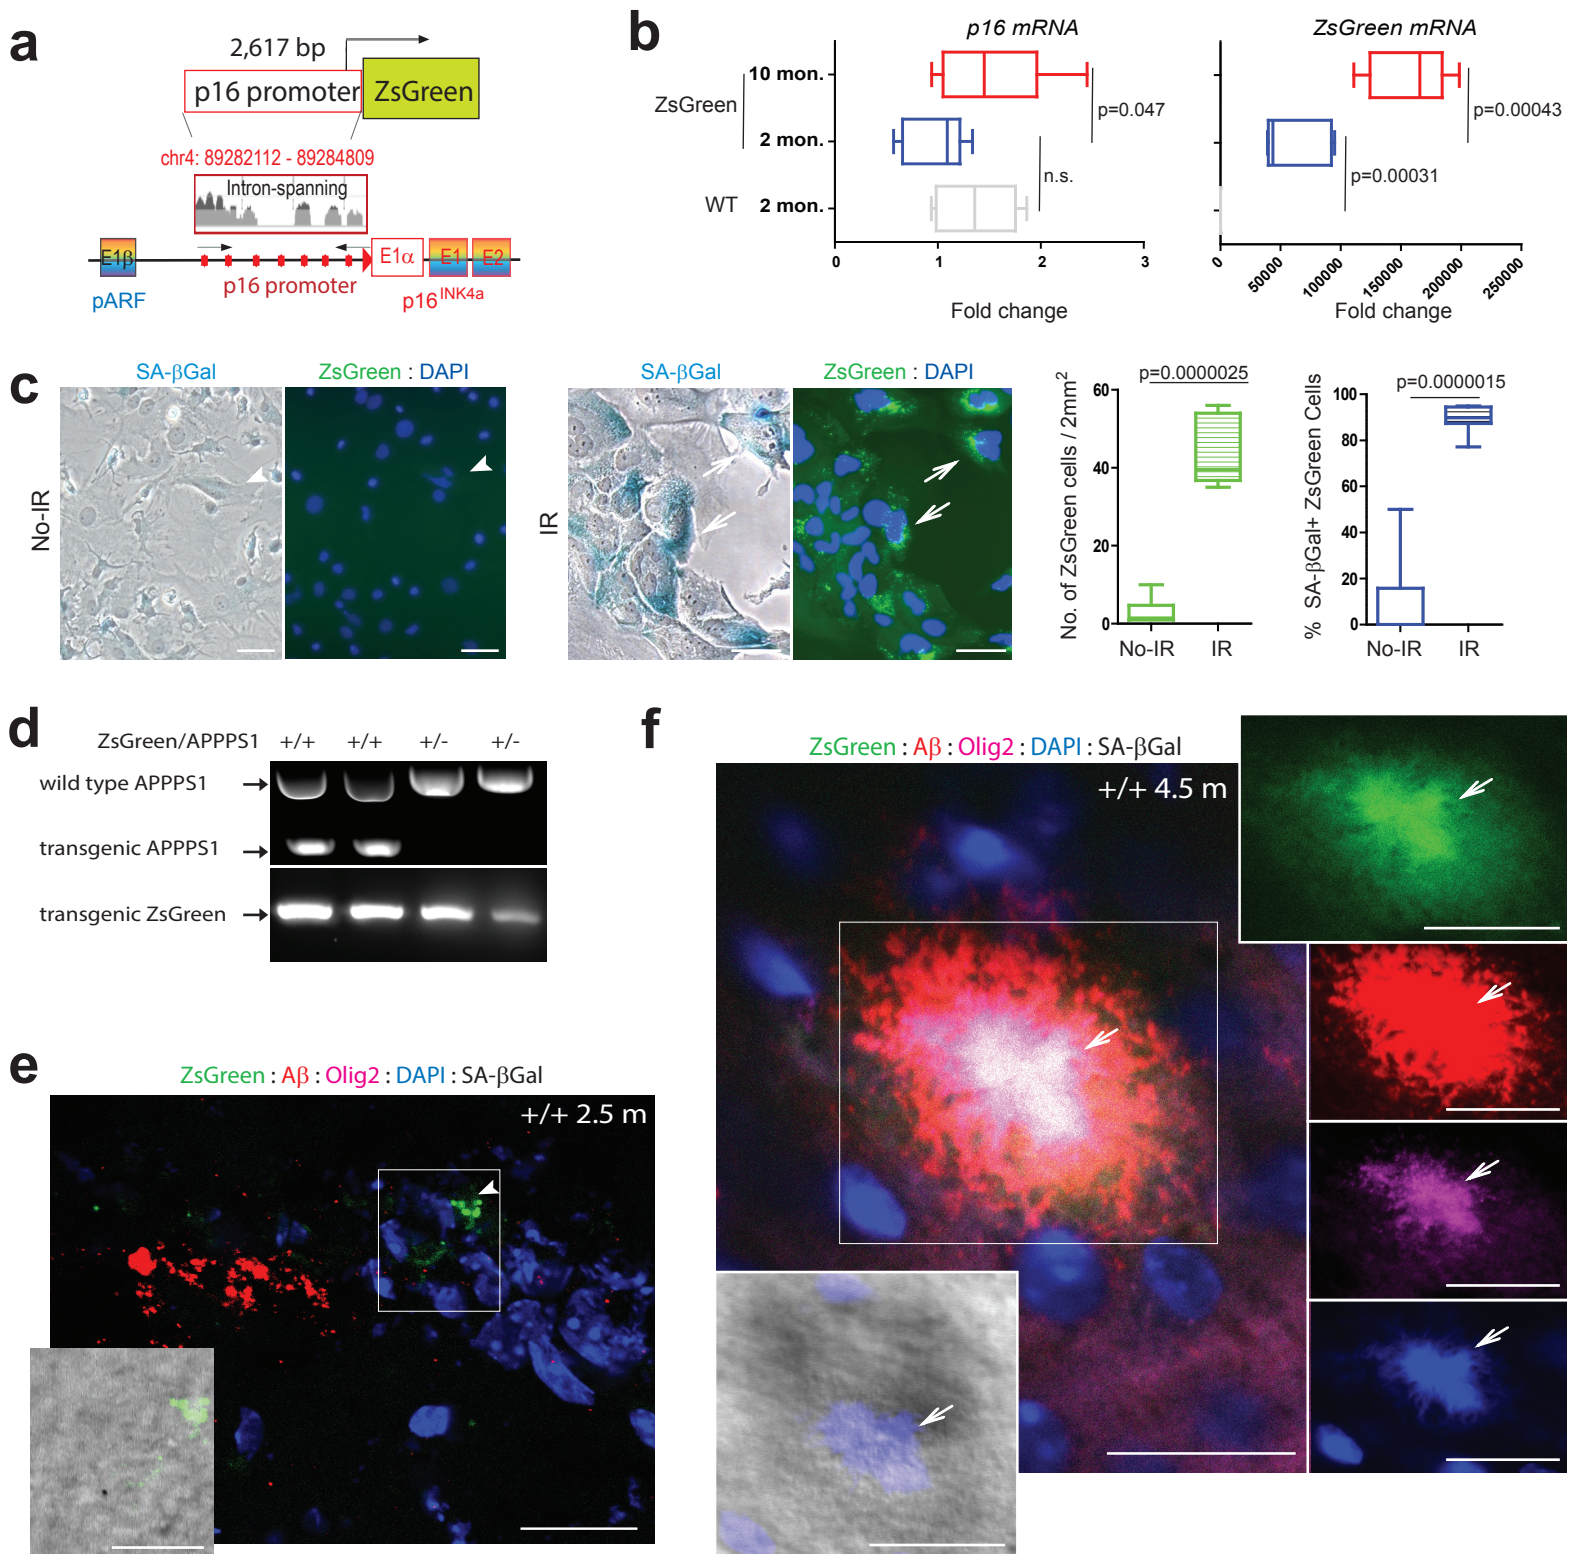

**Supplementary Figure 5.** Generating the ZsGreen senescence reporter mouse. **(a)** Schematics: a murine p16 promoter (see details in ref. 7) was cloned by PCR to drive the expression of the ZsGreen fluorescent protein. **(b)** The kidney from ZsGreen transgenic mice and wild type littermates at 2- and 10-month of ages were analyzed by RT-qPCR for the expression of *p16* and *ZsGreen* against *Gapdh*.  $n=3\sim 4$  mice per group. Two replicas per mice. **(c)** Four adult ZsGreen mouse brains were pooled and extracted for primary glial cultures for 3 d, and then subjected to 10 Gy irradiation (IR) and no-IR controls for 9 d. An arrowhead and arrows in the image panel point to the correlated expression of ZsGreen proteins with SA- $\beta$ Gal activities in glial cells upon IR exposure (right) and no-IR control (left).  $n=150\sim 200$  cells from 10 images in each group were analyzed. Scale bar =  $10\mu\text{m}$ . The statistics in b-c: two tailed Student's t-test; the state of box plots are described in Method. **(d)** Genotyping ZsGreen/APPPS1 mutant and wild type mice. **(e)** Image showing that a cell harboring few ZsGreen puncta (arrowhead, SA- $\beta$ Gal negative) was apart from a newly generated small A $\beta$  aggregate (red) in 2.5-month old ZsGreen/APPPS1 mouse brains. **(f)** Image showing the robust expression of ZsGreen in the SA- $\beta$ Gal+ and Olig2+ cell around a large-sized ( $>30\mu\text{m}$ ) A $\beta$  plaques in 4.5-month-old ZsGreen/APPPS1 mouse brains. Arrows point to the colocalization of ZsGreen (green) with A $\beta$  (red) and Olig2 (purple). Lower left insert showing the SA- $\beta$ Gal activity (black) in the ZsGreen cell. Scale bar =  $20\mu\text{m}$ . The results in d, e and f represent 8-20 images.  $n=3$  mice per group.

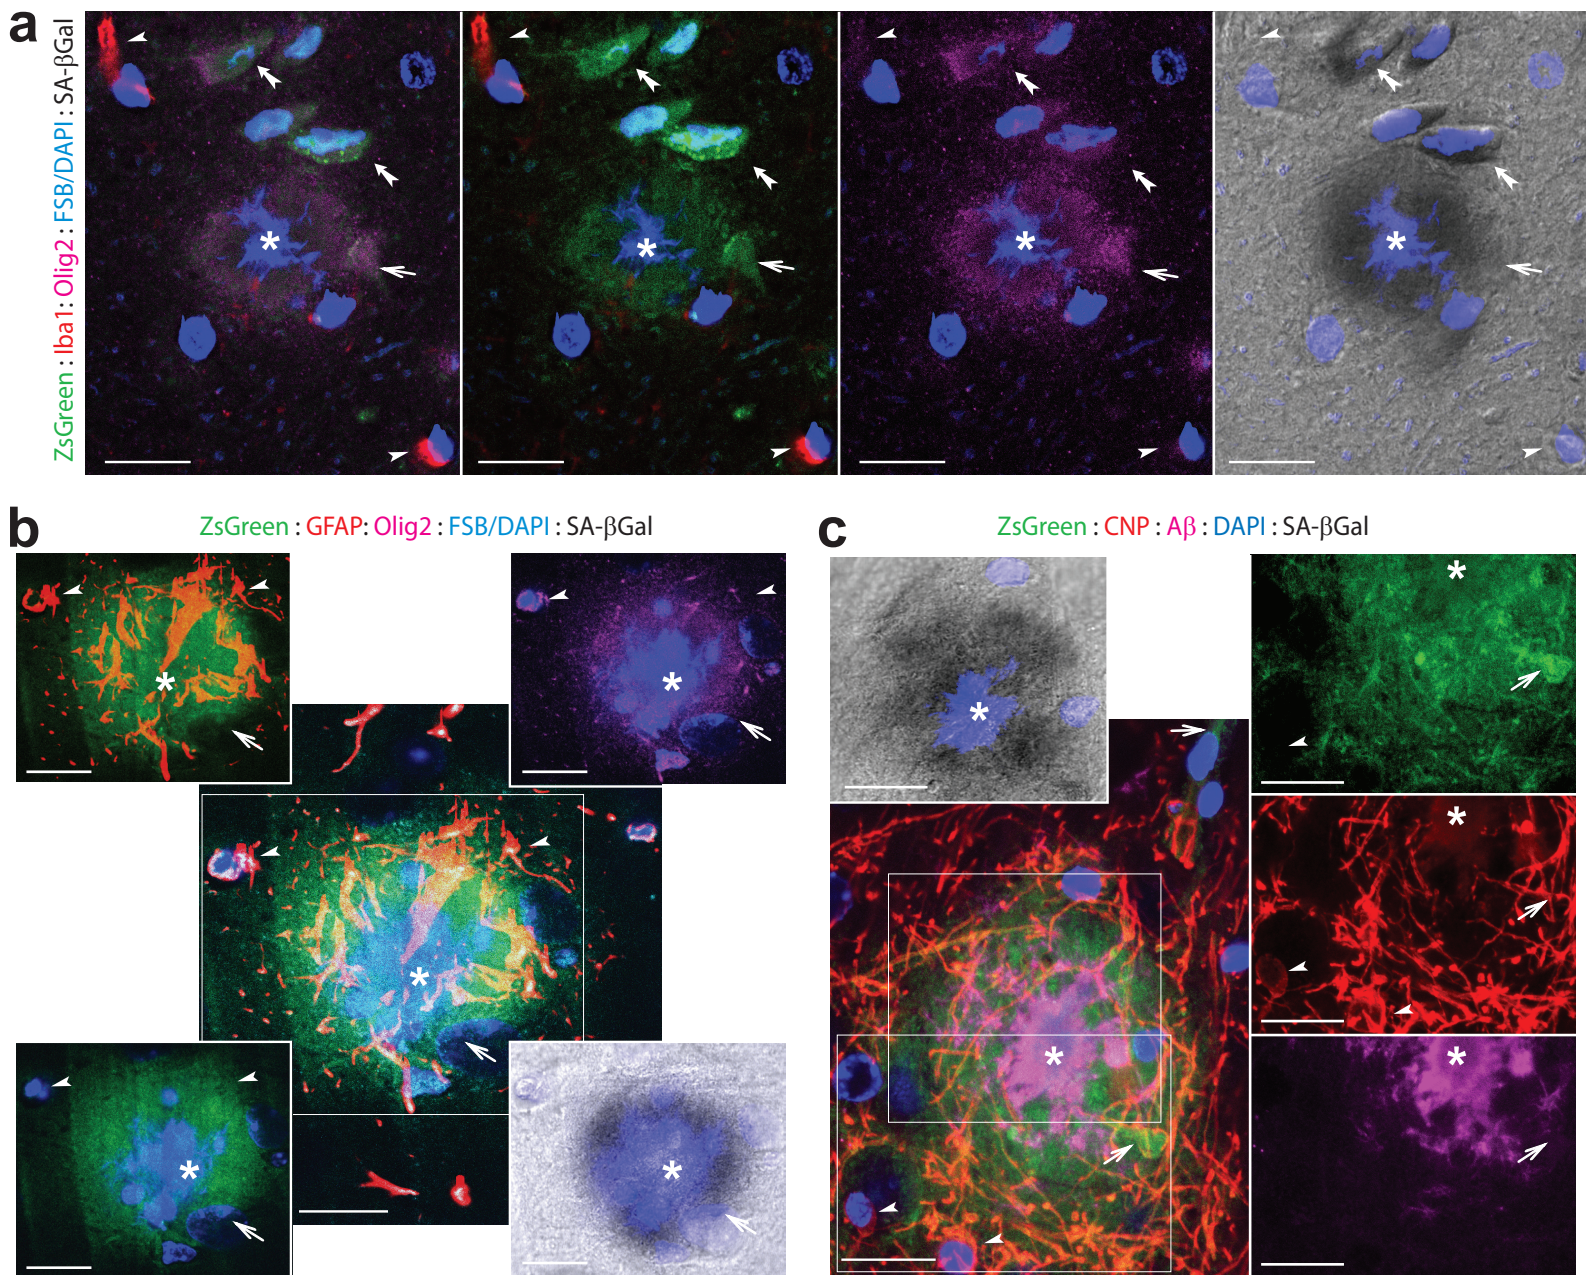

**Supplementary Figure 6.** Evidence that A $\beta$ -associated ZsGreen senescent cells are OPCs, but not astrocytes or microglia in ZsGreen/APPPS1 AD mouse brains. **(a)** The representative image showing that the A $\beta$  (blue FSB staining; asterisk)-associated ZsGreen cell exhibited Olig2 immunoreactivity (purple), but not Iba1 immunoreactivity (red). Arrowheads point to two Iba1+ cells around the A $\beta$  plaque. A arrow point to a flattened Olig2+ / SA- $\beta$ Gal+ ZsGreen cell surrounding the A $\beta$  plaque. Double arrows point to five of Olig2+ and SA- $\beta$ Gal+ ZsGreen cells with polarized soma were either next or merged with the A $\beta$  plaque. **(b)** The representative image showing the GFAP immunoreactivity (red) were undetectable in the A $\beta$ -associated ZsGreen cells. Arrowheads point to A $\beta$ -associated GFAP+ astrocytes and their processes. **(c)** The representative image showing that the CNP immunoreactivity (red) of oligodendrocytes (OLs) were barely detectable in an A $\beta$  (purple)-associated ZsGreen cell. Arrowheads point to CNP+ cells around the A $\beta$  plaque. An insert on up-left is the top boxed area in the merged image. The insets on right are the bottom boxed area in the merged image. Scale bar in each panel = 20  $\mu$ m. The images in a, b, and c represent 34, 32, 15 and 19 cells for each analysis. n=3 mouse brains.

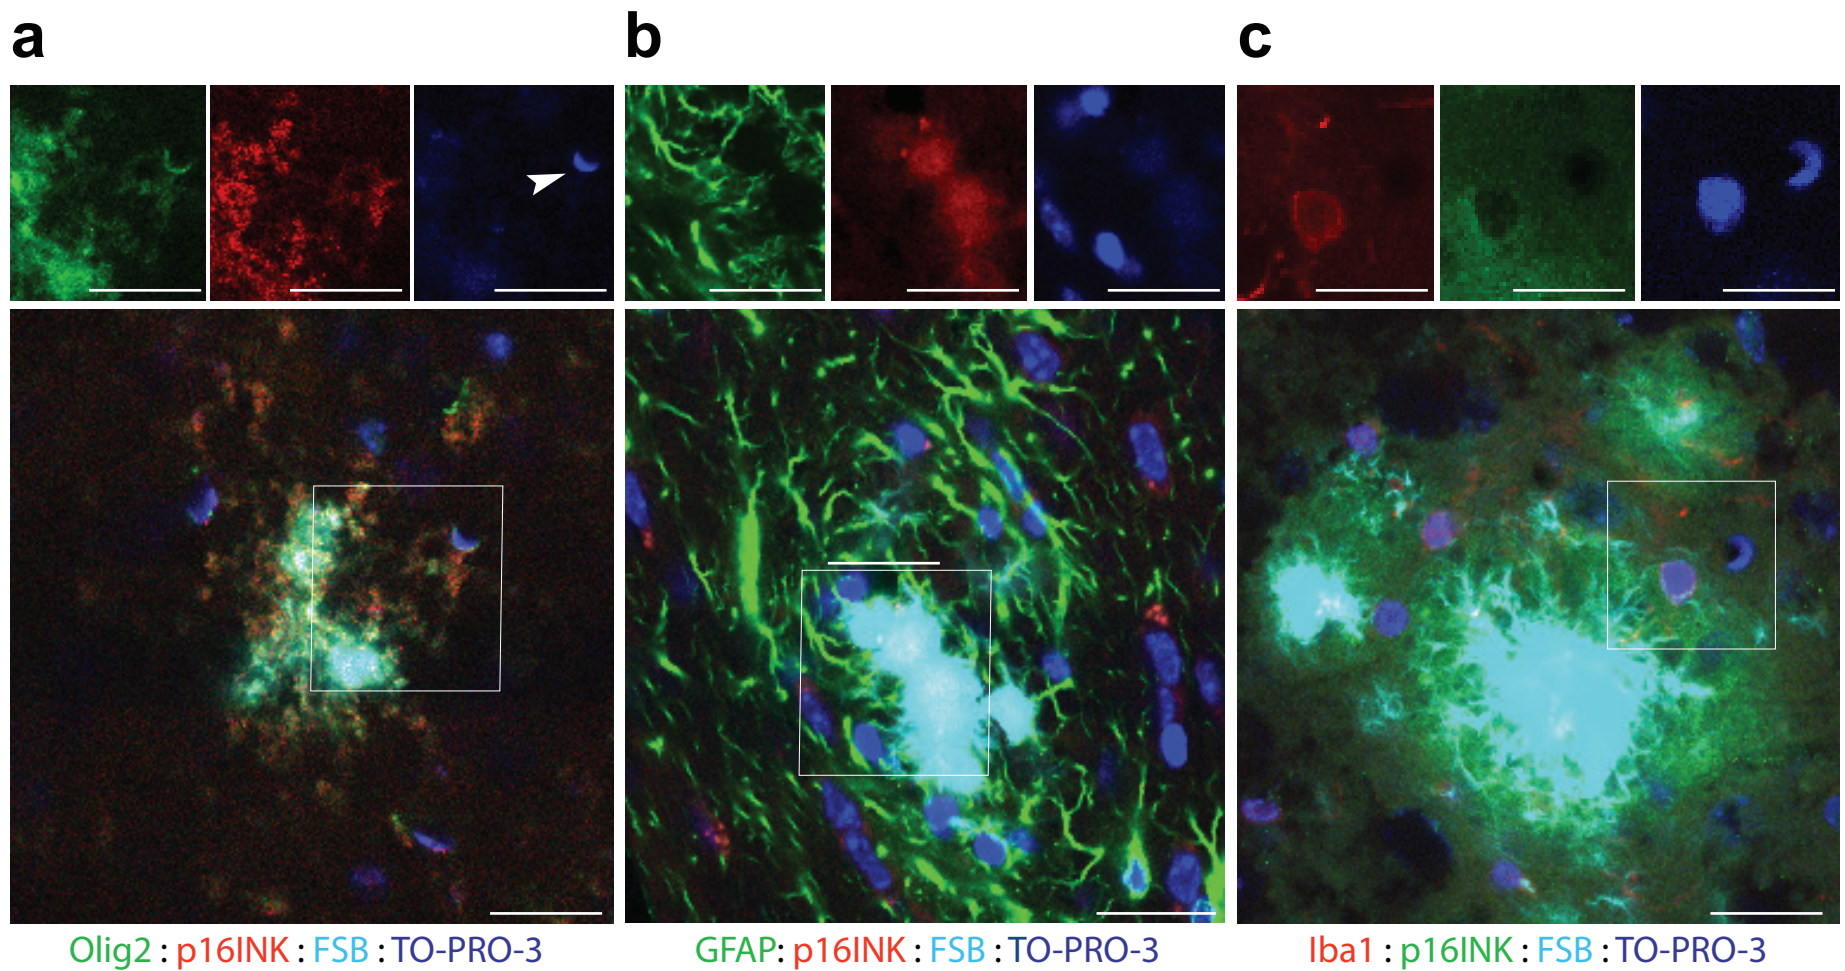

**Supplementary Figure 7.** Evidence that A $\beta$  plaque-associated senescent cells are OPCs, but not astrocytes or microglia in APP/PS1 AD mouse brains. **(a-c)** Spatial relationships between p16 immunoreactivity, Olig2+ OPCs (a), GFAP+ astrocytes (b) and Iba1+ microglia (c) in the A $\beta$  plaque (cyan) environment. Blue, TO-PRO3 nuclear staining. Top panels are single-color images of the boxed areas in the merged images shown in the lower panels. Scale bar in each panel = 20  $\mu$ m. The images in a, b, and c represent 8-10 images per analysis. n = 3 mouse brains.



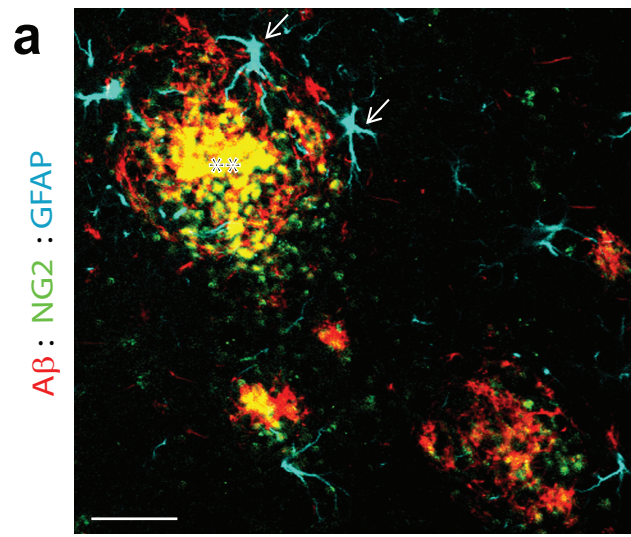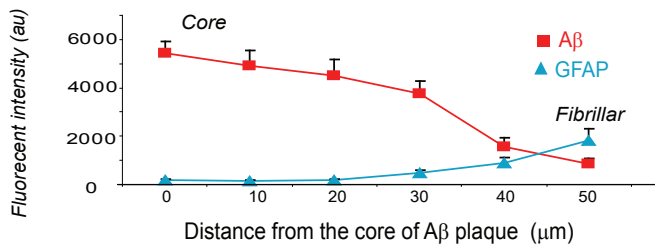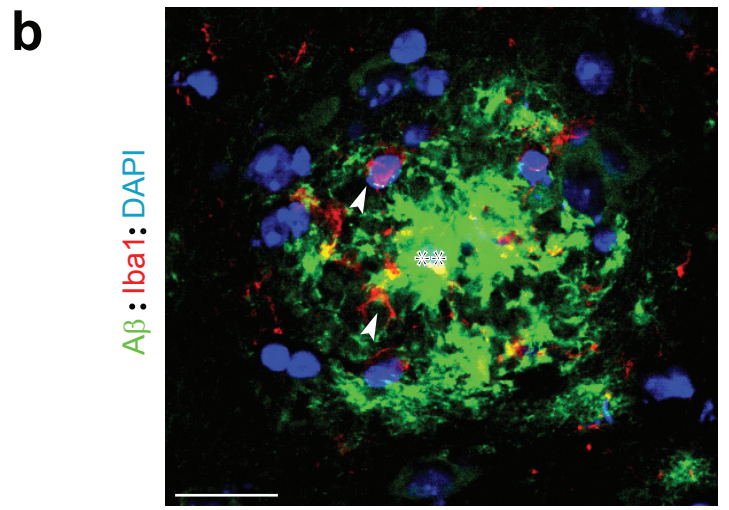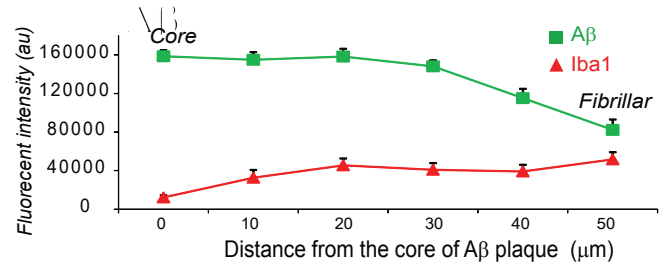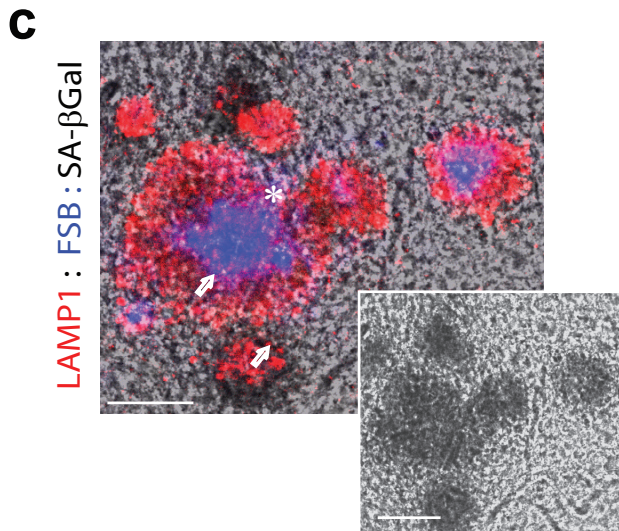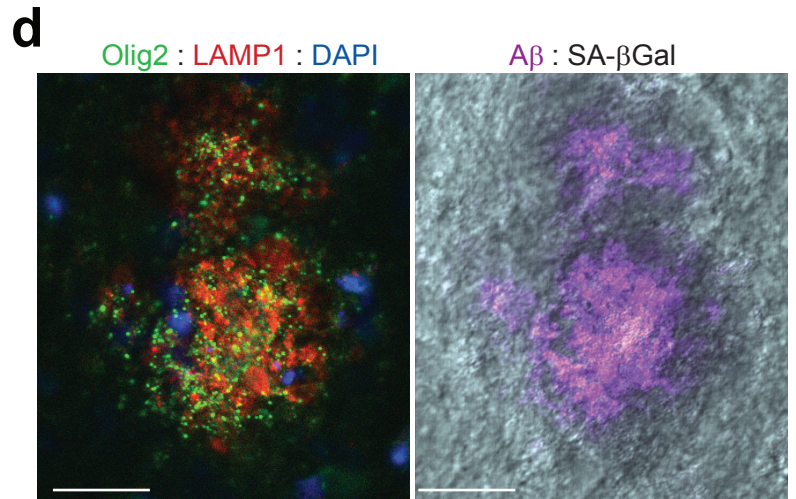

**Supplementary Figure 8.** Cell type identity of senescent cells. **(a)** Representative images showing that GFAP positive astrocytes (cyan blue, arrows) were located at the periphery of A $\beta$  plaques (red), which were distinct from NG2+ OPCs (green). The graph shows the relative fluorescence intensities of the indicated protein markers from the plaque core to the peripheral edge of the plaque (values are the mean and SEM of measurements made on 23 plaques). **(b)** Representative images of plaque-associated microglia identified by microglial marker Iba1 (red) at the periphery of A $\beta$  plaque. The graph shows the relative fluorescence intensities of the indicated proteins from the core to the peripheral edge of the plaque (values are the mean and SEM of measurements made on 22 plaques). **(c-d)** Confocal images showing robust co-localization of SA- $\beta$ Gal staining (black), LAMP1 (red) and Olig2 (green in d) immunoreactivity around the core of A $\beta$  plaques (blue in c, purple in d). Arrows in c point to colocalization of SA- $\beta$ Gal and LAMP1 in lysosomal compartments. Scale bars are 20  $\mu$ m in each panel. The images in a, b, c and d represent 22- 35 plaques per analysis. n = 3 mouse brains.

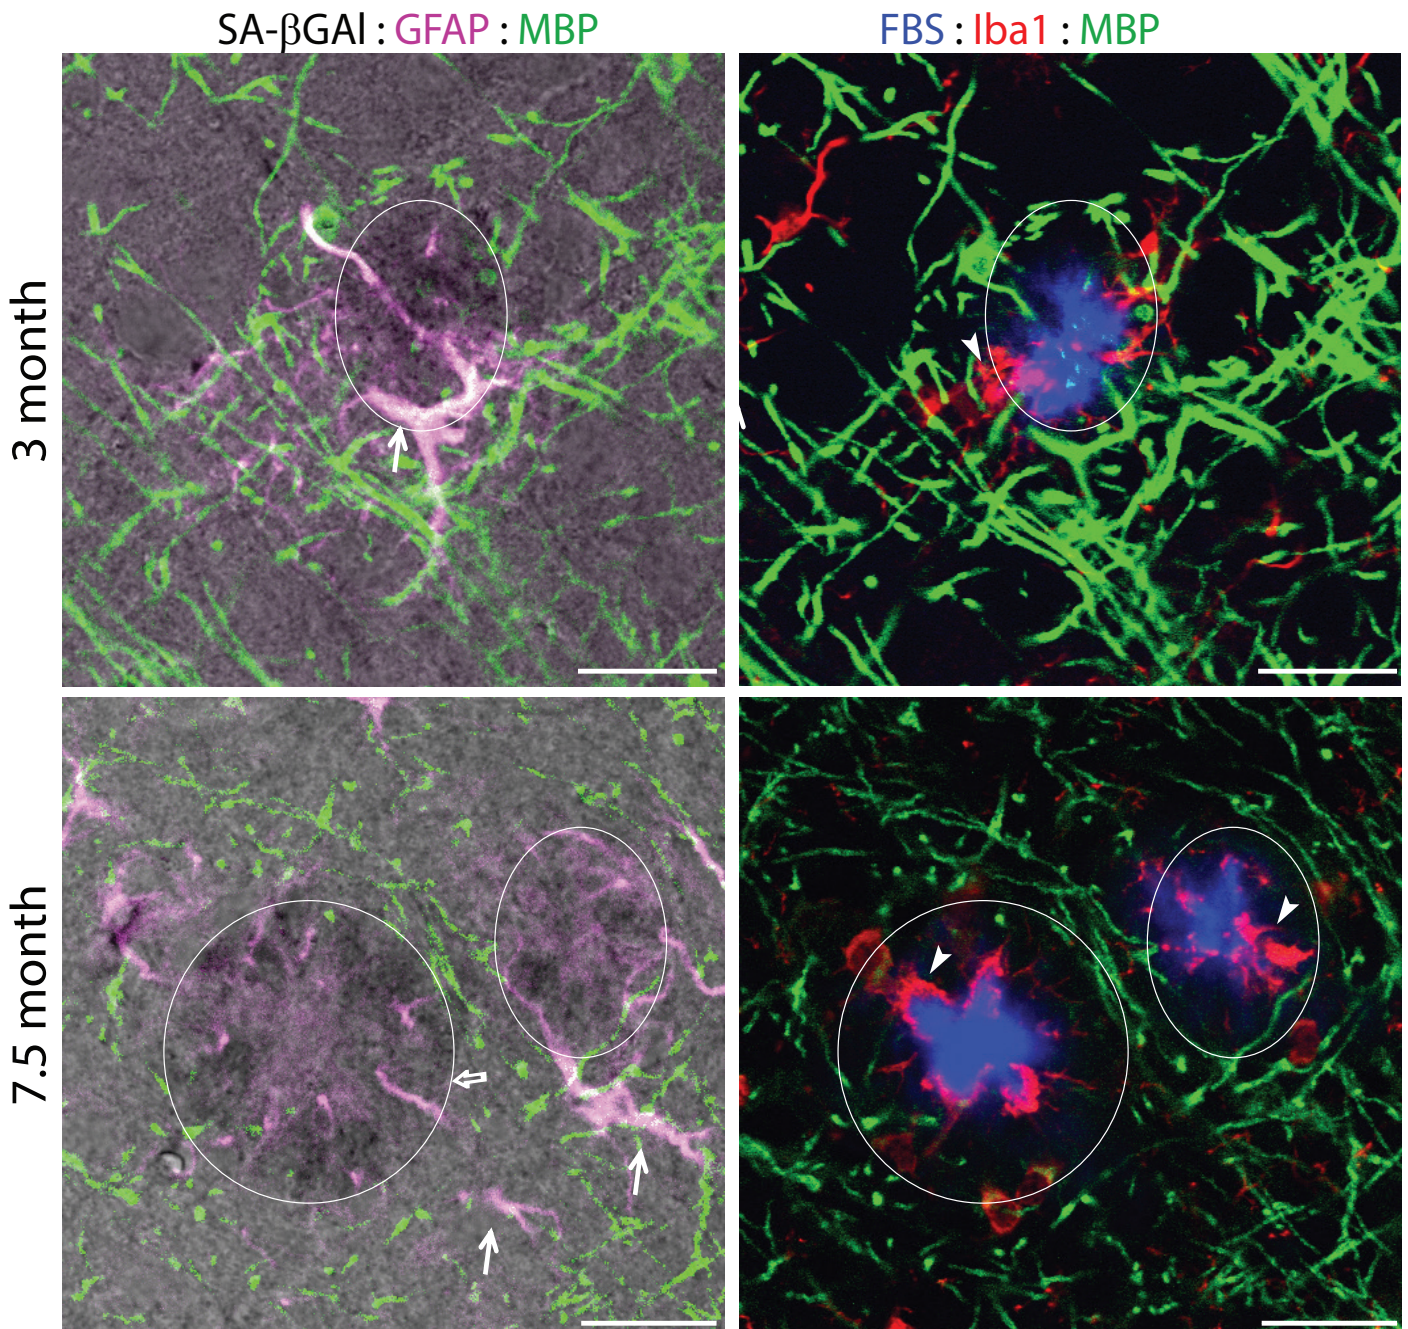

**Supplementary Figure 9.** Spatial relationships between cells exhibiting SA-βGal activity, astrocytes, microglia, and myelinated axons in regions of Aβ plaques in the brains of 3- and 7.5-month-old APP/PS1 mutant mice. Brain sections were stained for SA-βGal (black), and immunostained with antibodies against MBP (green; myelinated axons) and GFAP (pink; astrocytes) or Iba1 (red; microglia). Sections were also stained with FSB to label fibrillar Aβ (blue). The circles demarcate regions exhibiting SA-βGal activity and extensive demyelination. Arrowheads point to microglia. Scale bar = 20 μm. The images represent 15- 25 plaques per analysis. n = 3 mouse brains.

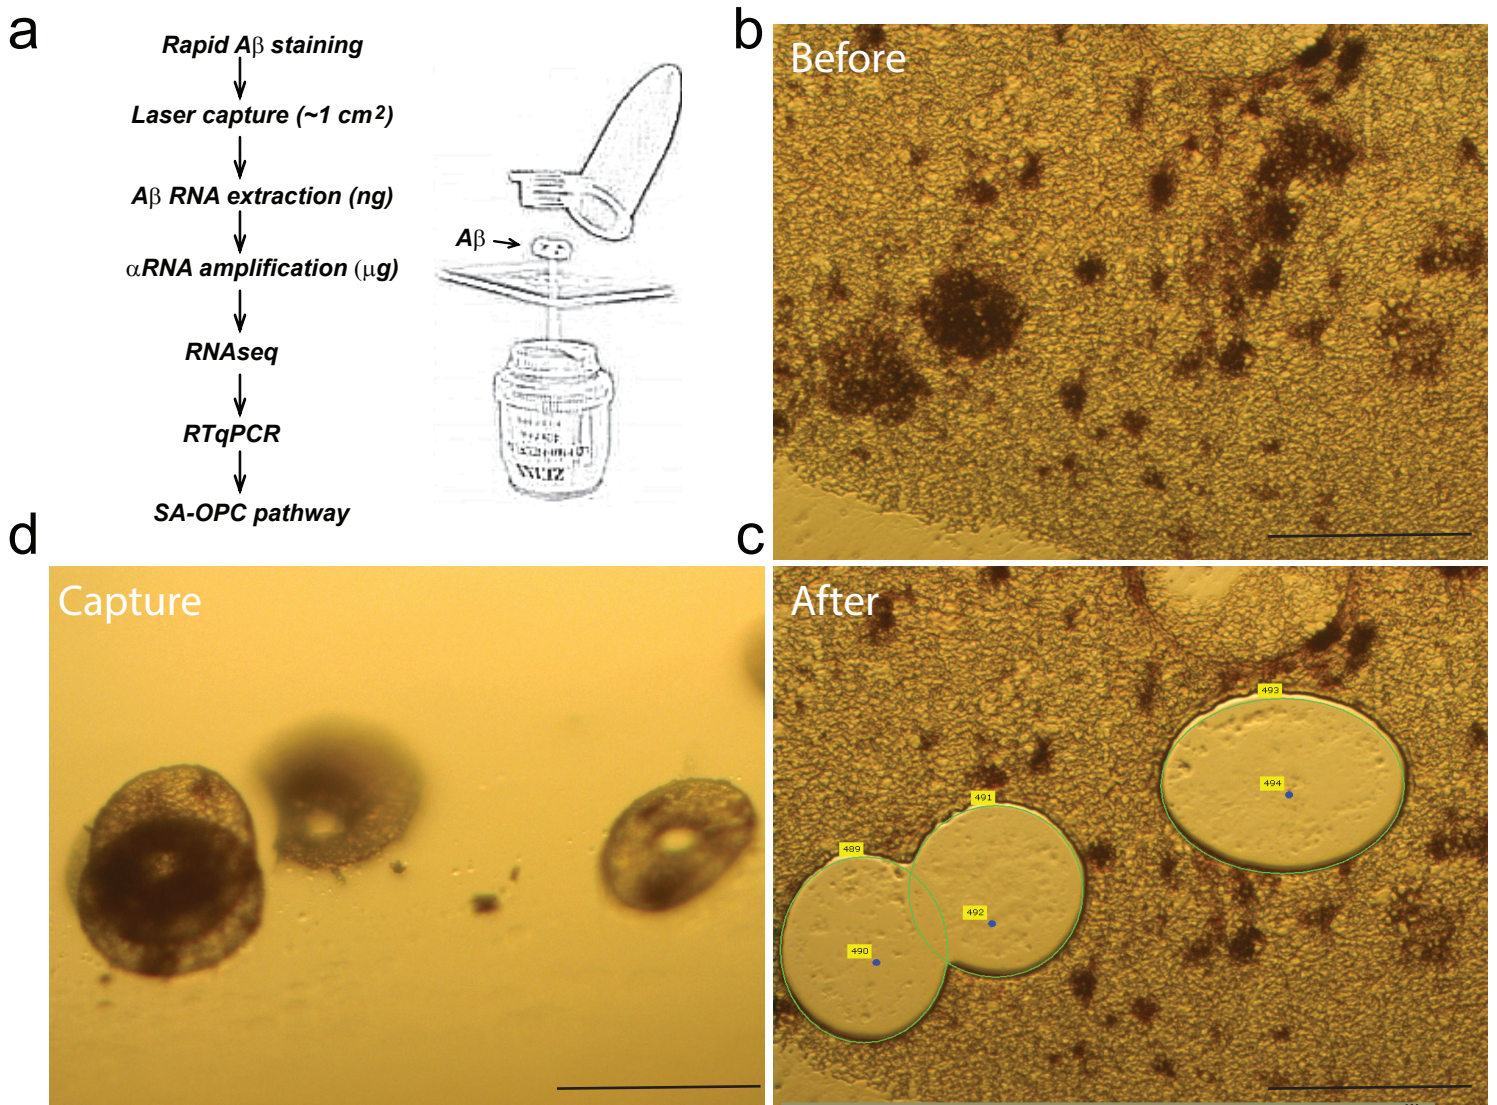

**Supplementary Figure 10.** Laser capture microdissection (LCM) and RNA analysis of A $\beta$  plaques in brain tissue samples. **(a)** Schematic illustration of LCM workflow **(b - c)** Images of an A $\beta$  plaque-laden brain section from a 9-month-old APP/PS1 mutant mouse before **(b)** and after **(c)** LCM. **(d)** Representative image showing the pieces of tissue removed from the same brain section. The brain section was immunostained with anti-A $\beta$  antibody using the DAB detection method for plaque visualization prior to LCM. Scale bar in each panel =100  $\mu$ m. The images in a, b, c and d represent 160- 220 times of laser dissections from 5-6 sections per brain. n = 3 mouse brains.

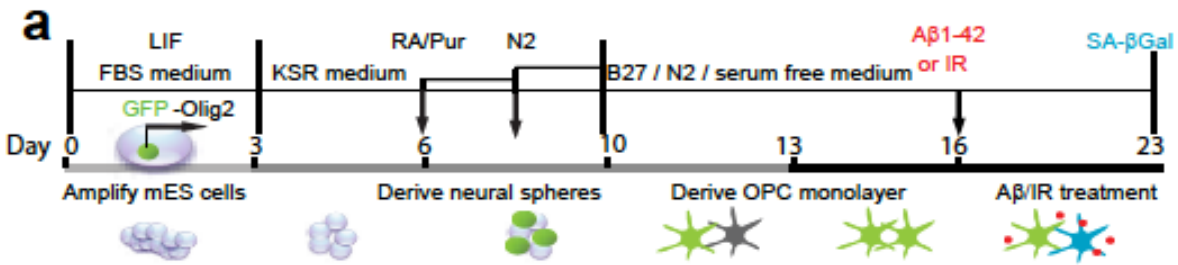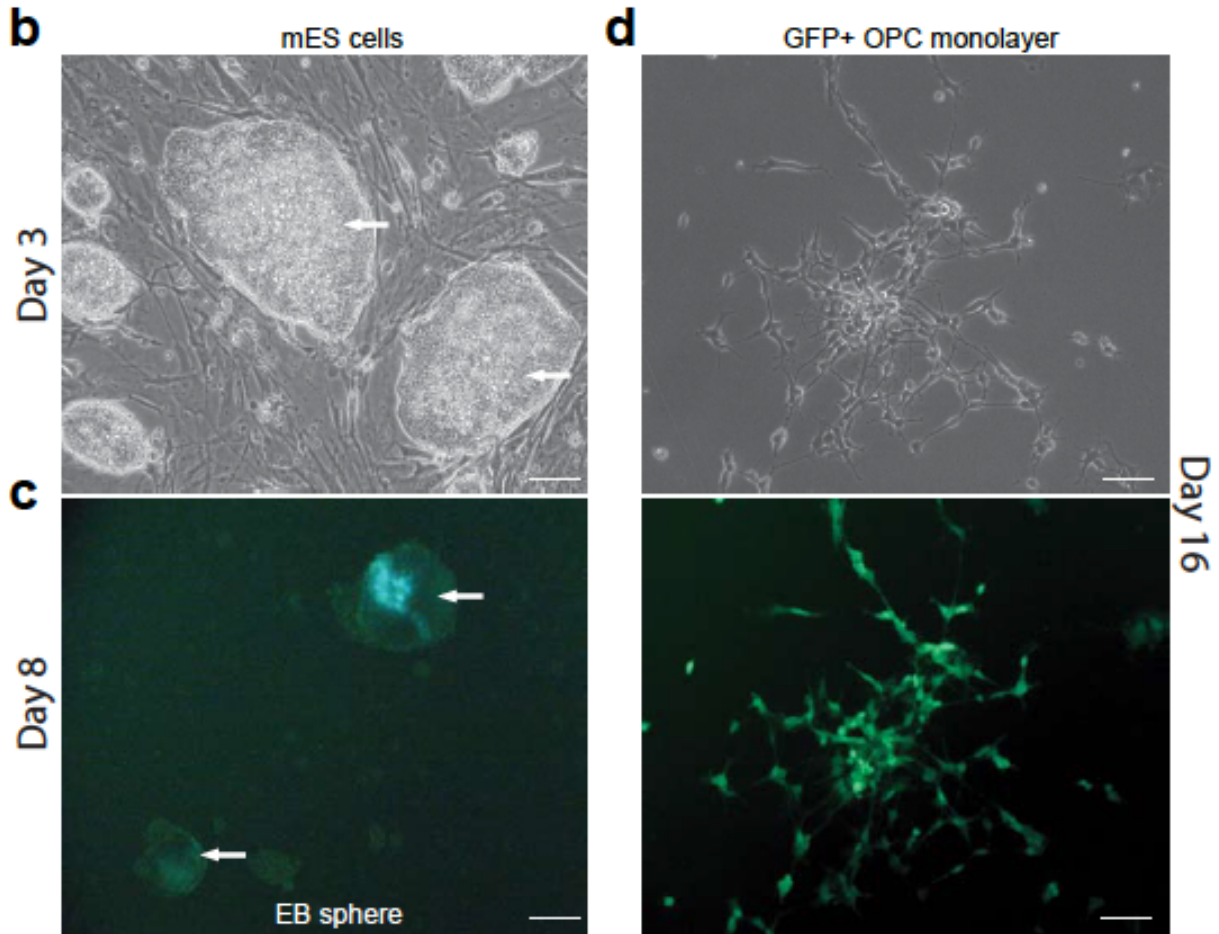

**Supplementary Figure 11.** Differentiation of GFP-Olig2 mouse embryonic stem cell (mESC)-derived OPCs. **(a)** Schematic illustration showing the protocol for differentiating mESCs. **(b)** Phase-contrast image showing undifferentiated mESC colonies not expressing GFP-Olig2 fusion protein (arrows) growing on a feeder layer of mouse embryonic fibroblasts. **(c)** The fluorescent image showing GFP-Olig2 expressing OPCs in embryoid bodies (EB, arrows) on culture day 8. **(d)** Highly enriched GFP-expressing OPC populations at culture day 16. Scale bar = 50  $\mu$ m. The images in b, c and d represent the results from 3 different experiments.

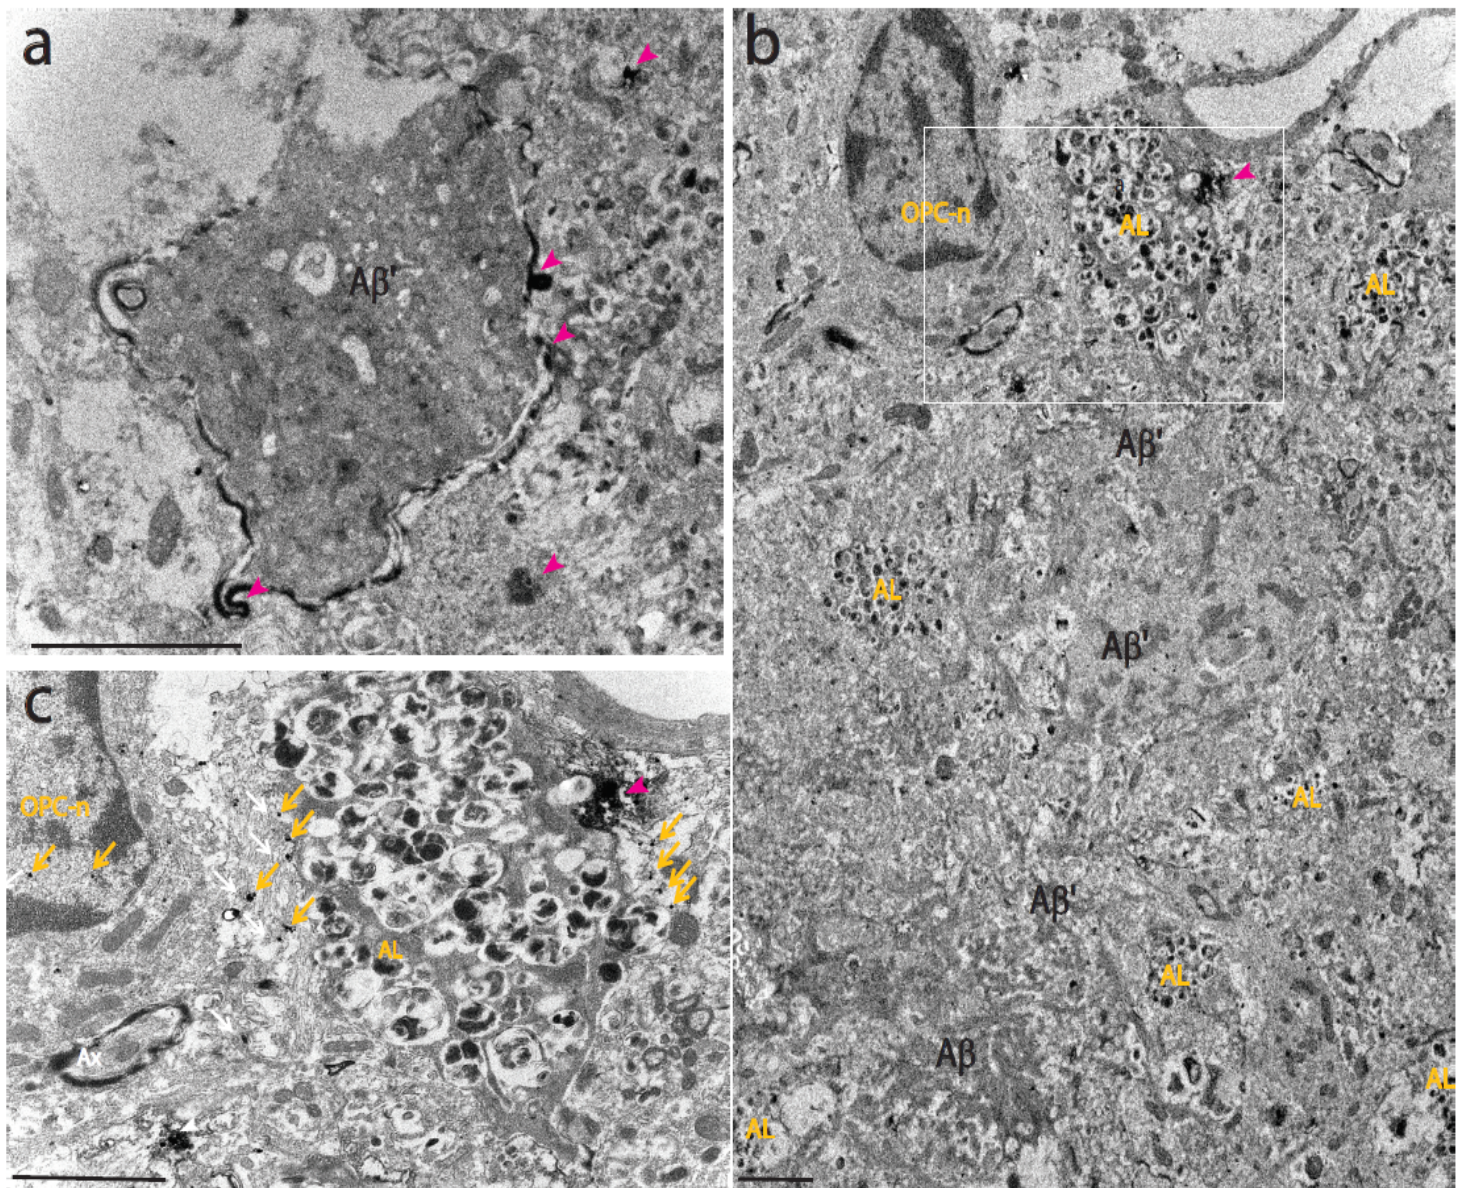

**Supplementary Figure 12.** Electron micrographs showing the A $\beta$  plaque environment in brain tissue sections from APP/PS1 AD mice. **(a)** Electron micrograph showing A $\beta$  signals seen as dark scattered material (pink arrowheads) around A $\beta$  aggregates (A $\beta$ '). **(b)** Spatial relationships of an OPC with the Olig2-positive autolysosomes (AL) and the A $\beta$  aggregates in the periphery of a plaque (A $\beta$ '). OPCn, OPC nucleus; A $\beta$ , plaque core. Arrowhead points to autolysosome-mediated up take of A $\beta$  in the OPC. **(c)** The enlarged image of the boxed area in panel b shows Olig2+ gold particles (yellow arrows) located adjacent to the A $\beta$  deposit and the AL as well as in the cytoplasm and nucleus of OPC. The pink arrowhead points to an A $\beta$  seen as dark scattered materials in contact with the AL. Scale bar = 2  $\mu$ m. The images represent the results from seven EM blocks (n =7).

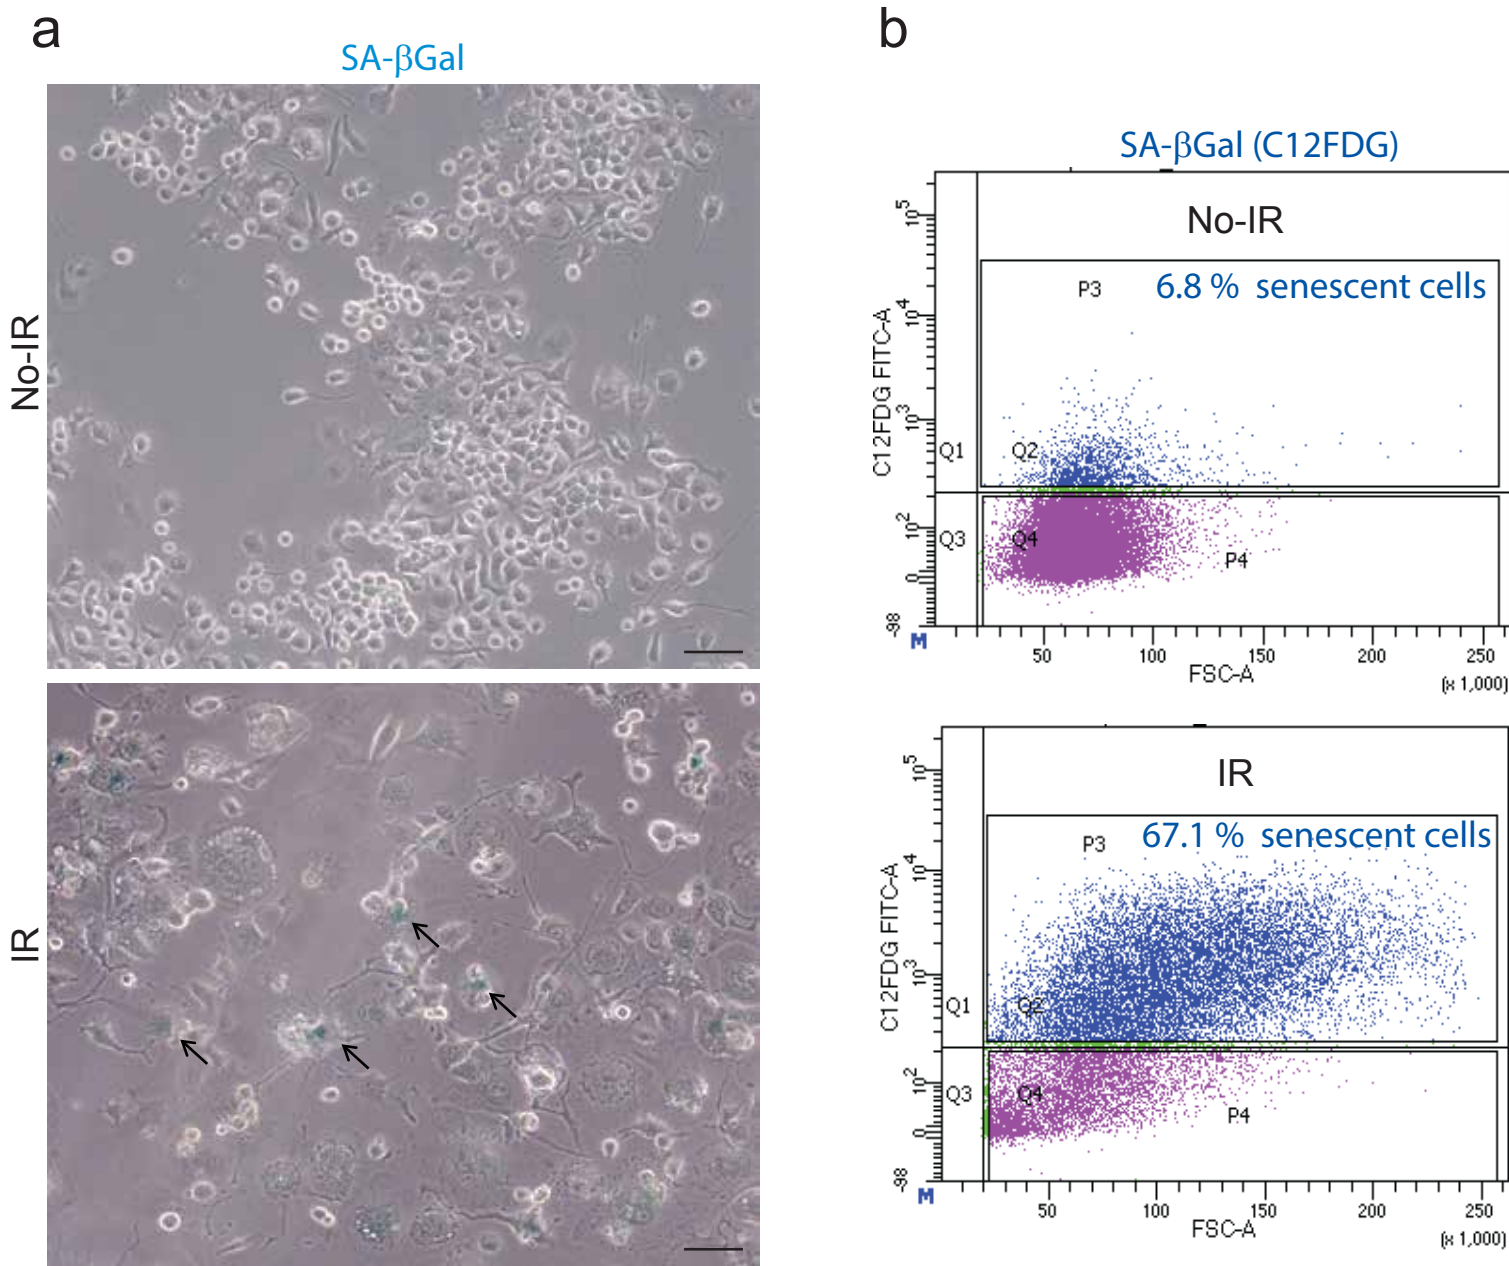

**Supplementary Figure 13.** Validation of C12FDG-FACS method for detecting senescence activity. **(a)** Upon exposure of neuro2a (N2a) cells to 10 Gy irradiation (IR) for 7 d, less than 15% senescent cells (arrows) were visible via the conventional method of SA- $\beta$ Gal staining. The images represent 10-15 image per group. **(b)** 5 d after IR, more than 60% cells manifested senescence activity by fluorescence-activated cell sorting (FACS) analysis using the fluorogenic substrate C12FDG. The results represent the data from three different experiments.

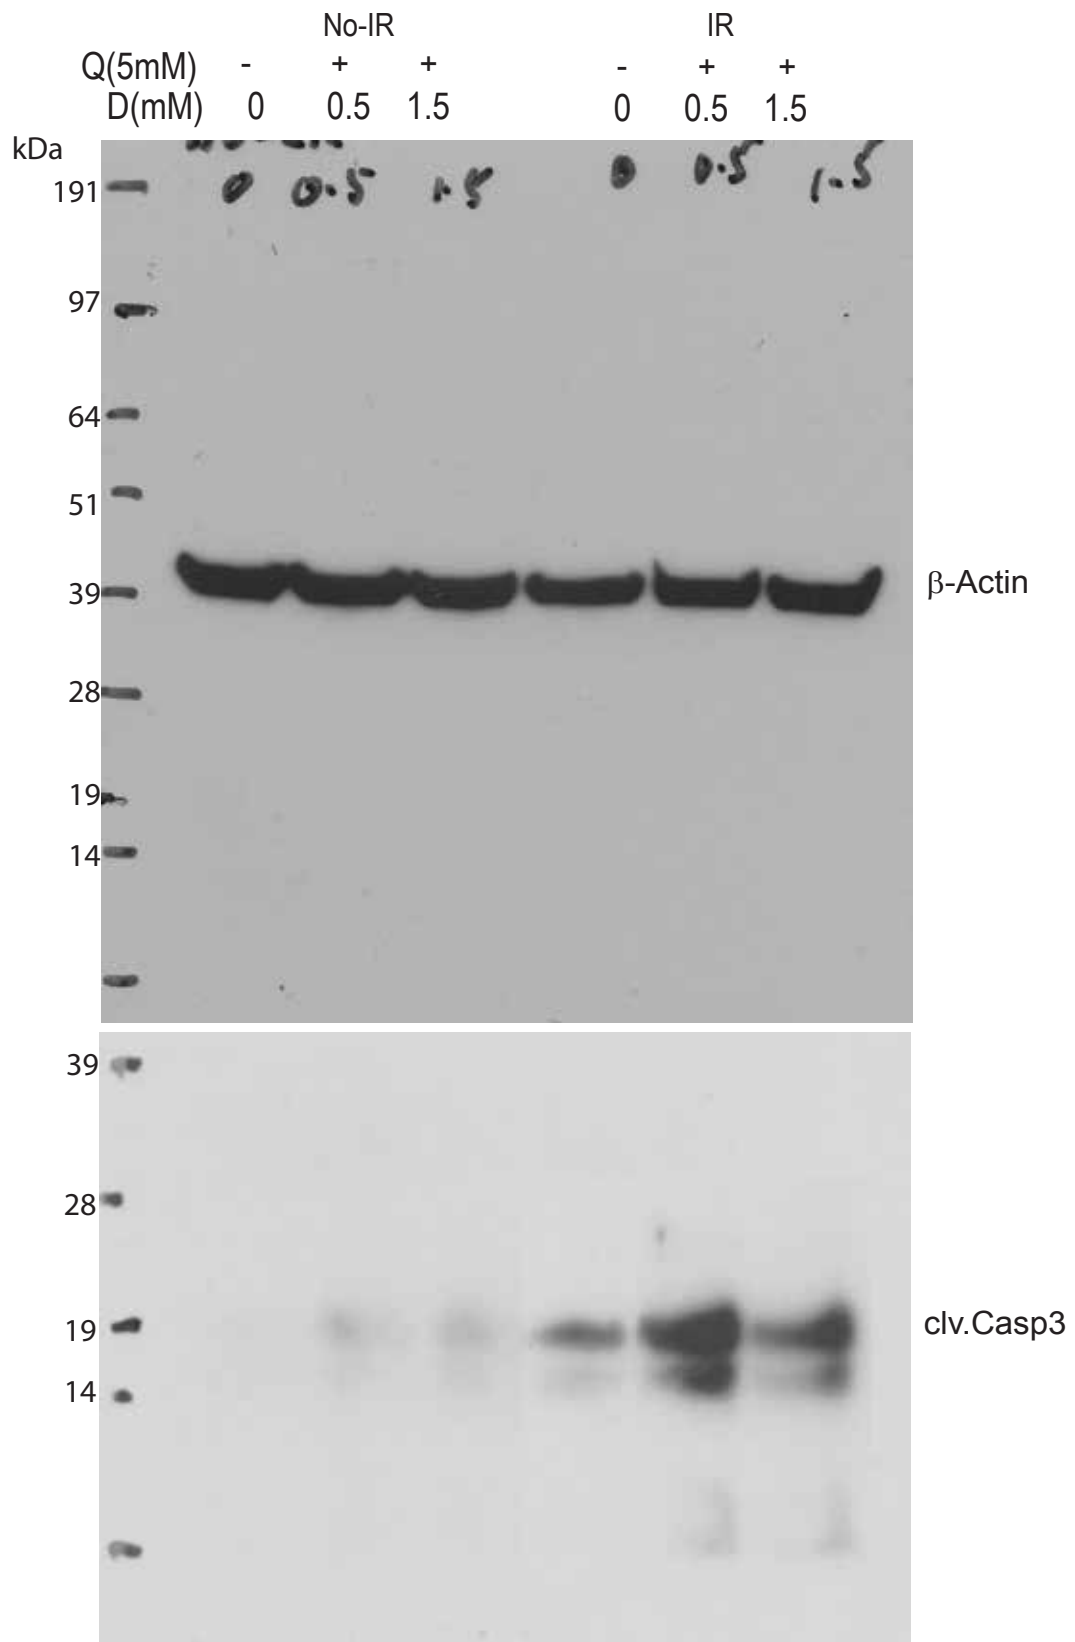

**Supplementary Figure 14.** Full scan of western blots for the insert in Figure 4a. n= 3 biological replicates.

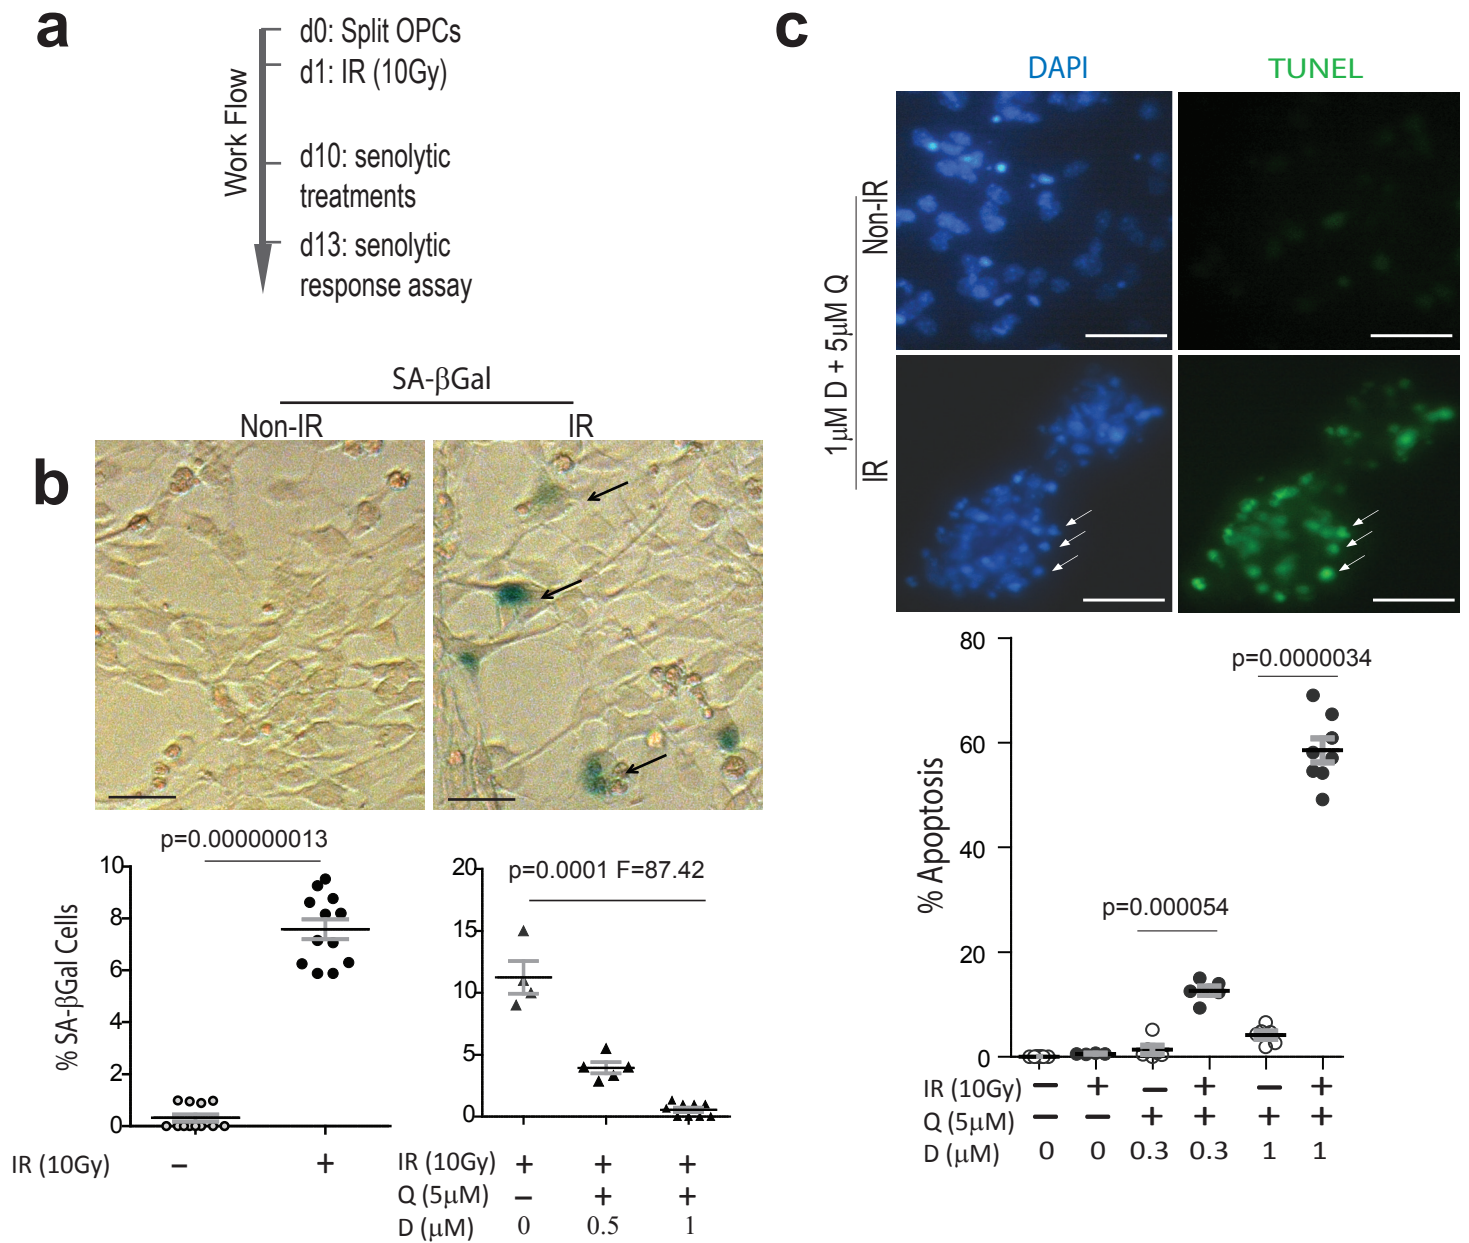

**Supplementary Figure 15.** The dasatinib and quercetin cocktail (D+Q) has senolytic activity in vitro. **(a)** Schematic of experimental design for sequential exposure of OPC cultures to 10 Gy ionizing radiation (IR) and D+Q. **(b)** 10 d after IR, irradiated OPCs and non-IR counterparts were treated with 5μM of Q plus varied doses of D for 3 d, and then were subjected to SA-βGal staining. Arrows in upper panel point to SA-βGal positive cells. The graphs show the percentage of senescent cells with or without D+Q treatments. Two tailed Student's t-test (left graph) and one-way ANOVA with Dunnett's post hoc (right graph) were made in 3 separate cultures (n = 3) with 4 - 12 images (200 - 240 cells) per condition. Values are the means and SEM. Scale bar = 30 μm. **(c)** D+Q mediated apoptosis were examined by TUNEL assay. 10 d after IR, irradiated OPCs and non-IR controls were treated with D+Q for 3 d, and then were subjected to DAPI (blue) and TUNEL (green) fluorescence assay. Arrows in lower panel point to apoptotic nuclei. Scale bar = 25 μm. The graph shows the percentage of apoptotic OPCs in response to various doses of D+Q. Values are the means and SEM of measurements made in 3 separate cultures (n = 3) of 4 - 8 images with total 100 - 200 cells, and significance was determined with two-tailed Student's t test.



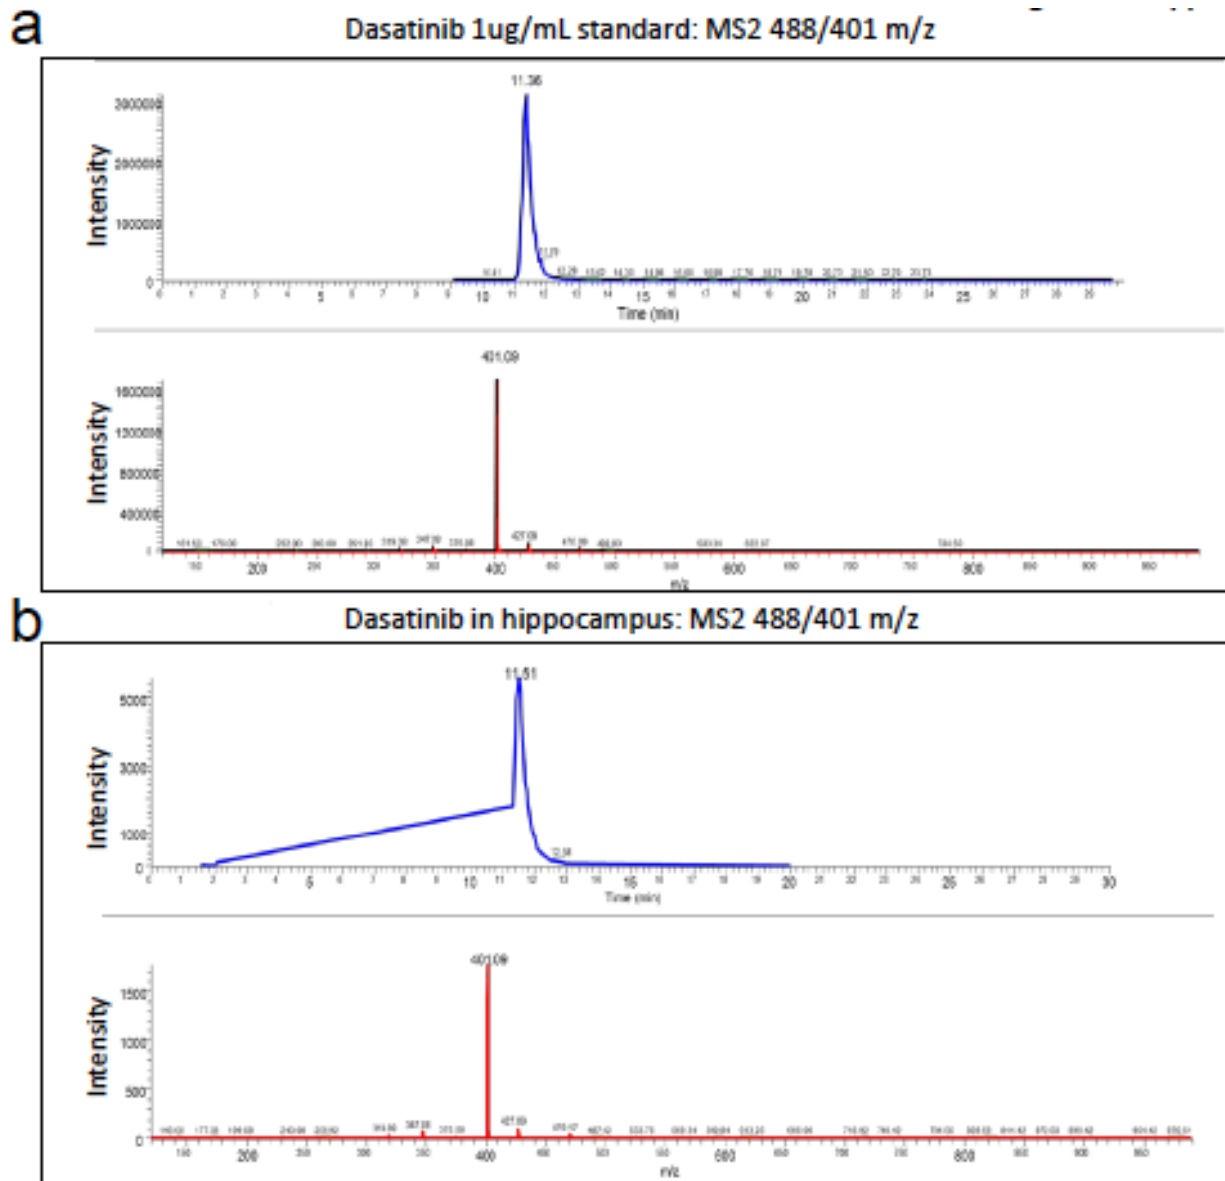

**c**

| Substance measured | Mice      | Plasma | Brain tissue |            |
|--------------------|-----------|--------|--------------|------------|
|                    |           |        | Hippocampus  | Cerebellum |
| Dasatinib (ng/ml)  | APP/PS1-a | 22.34  | 57.17        | 13.98      |
|                    | APP/PS1-b | 8.05   | 10.90        | 14.33      |

**Supplementary Figure 16.** Mass spectrometric characterization of dasatinib (D) in mouse hippocampus and cerebellum. **(a, b)** Chromatograms of D standard (a), and its level in hippocampus (b) 2 hours after oral treatment with 12 mg/kg of D. **(c)** Average concentrations of D in the plasma and brain tissues of two APP/PS1 mice at 2 hours after oral administration of D (12 mg/kg). The results in a, b represent two separated experiments from two mice tissues as indicated in c.

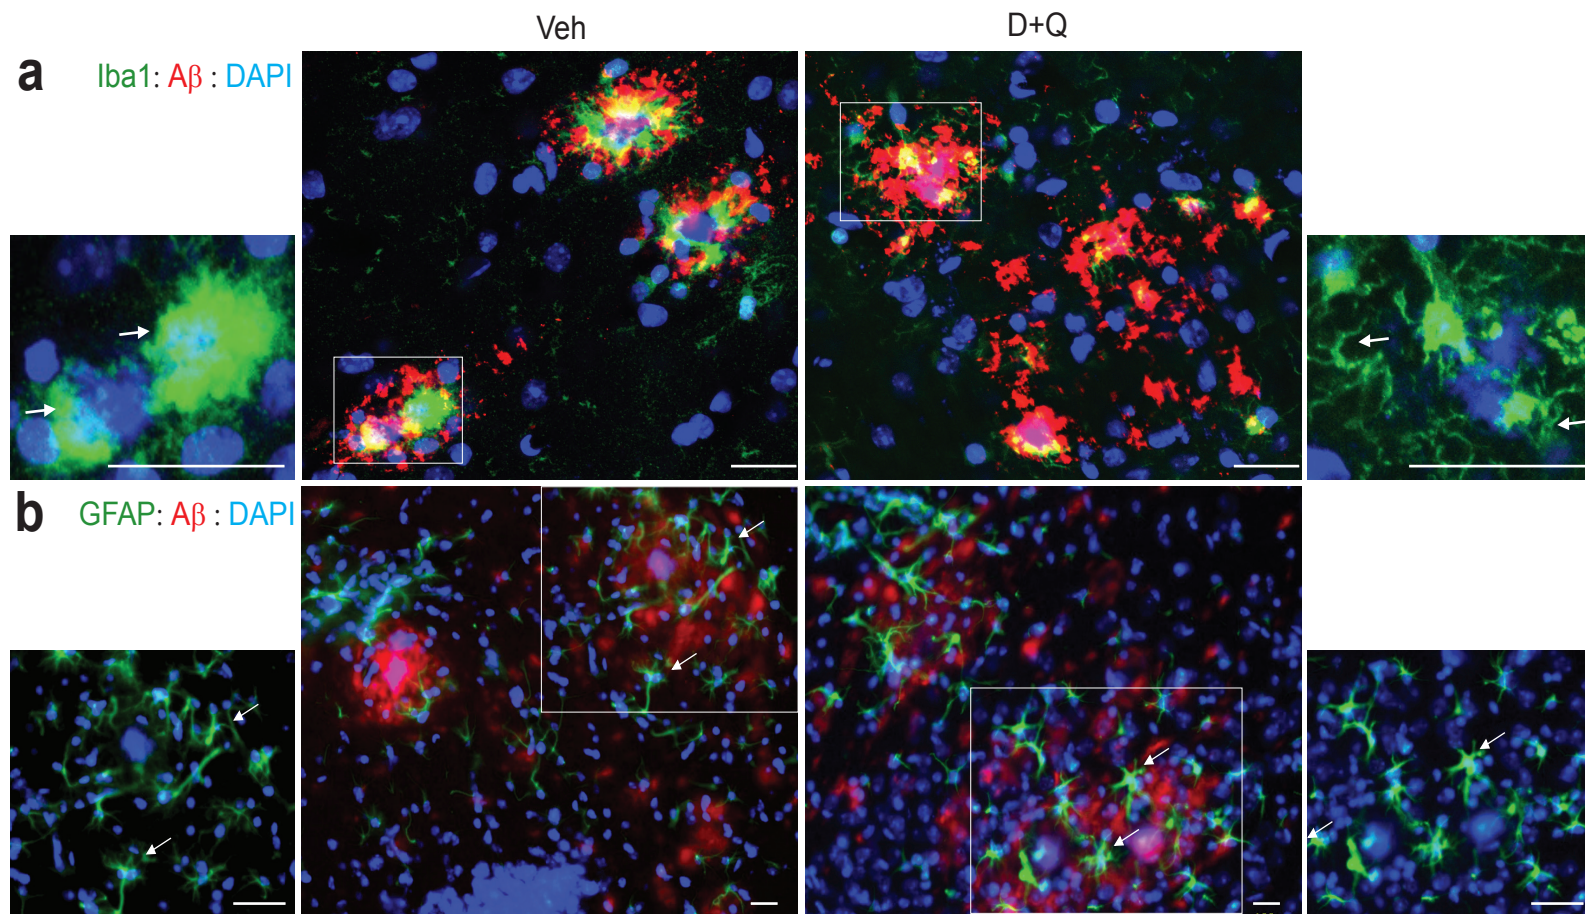

**Supplementary Figure 17.** Plaque-associated cellular responses of 9-day short-term D+Q treatment in APP/PS1 mice. The sections from same brains were immunostained using antibodies against Iba1 (green in a), GFAP (green in b) and A $\beta$  (red). Arrows in a point to microglia with retracted processes and an enlarged soma in vehicle control (left most insert) or with ramified fine processes in the D+Q group (right most insert). Arrows in b point to astrocytes with similar morphologies in D+Q and vehicle control groups. Scale bar = 20  $\mu$ m. The images in a and b represent 15 images for each analysis. n = 3 mouse brains in each group.

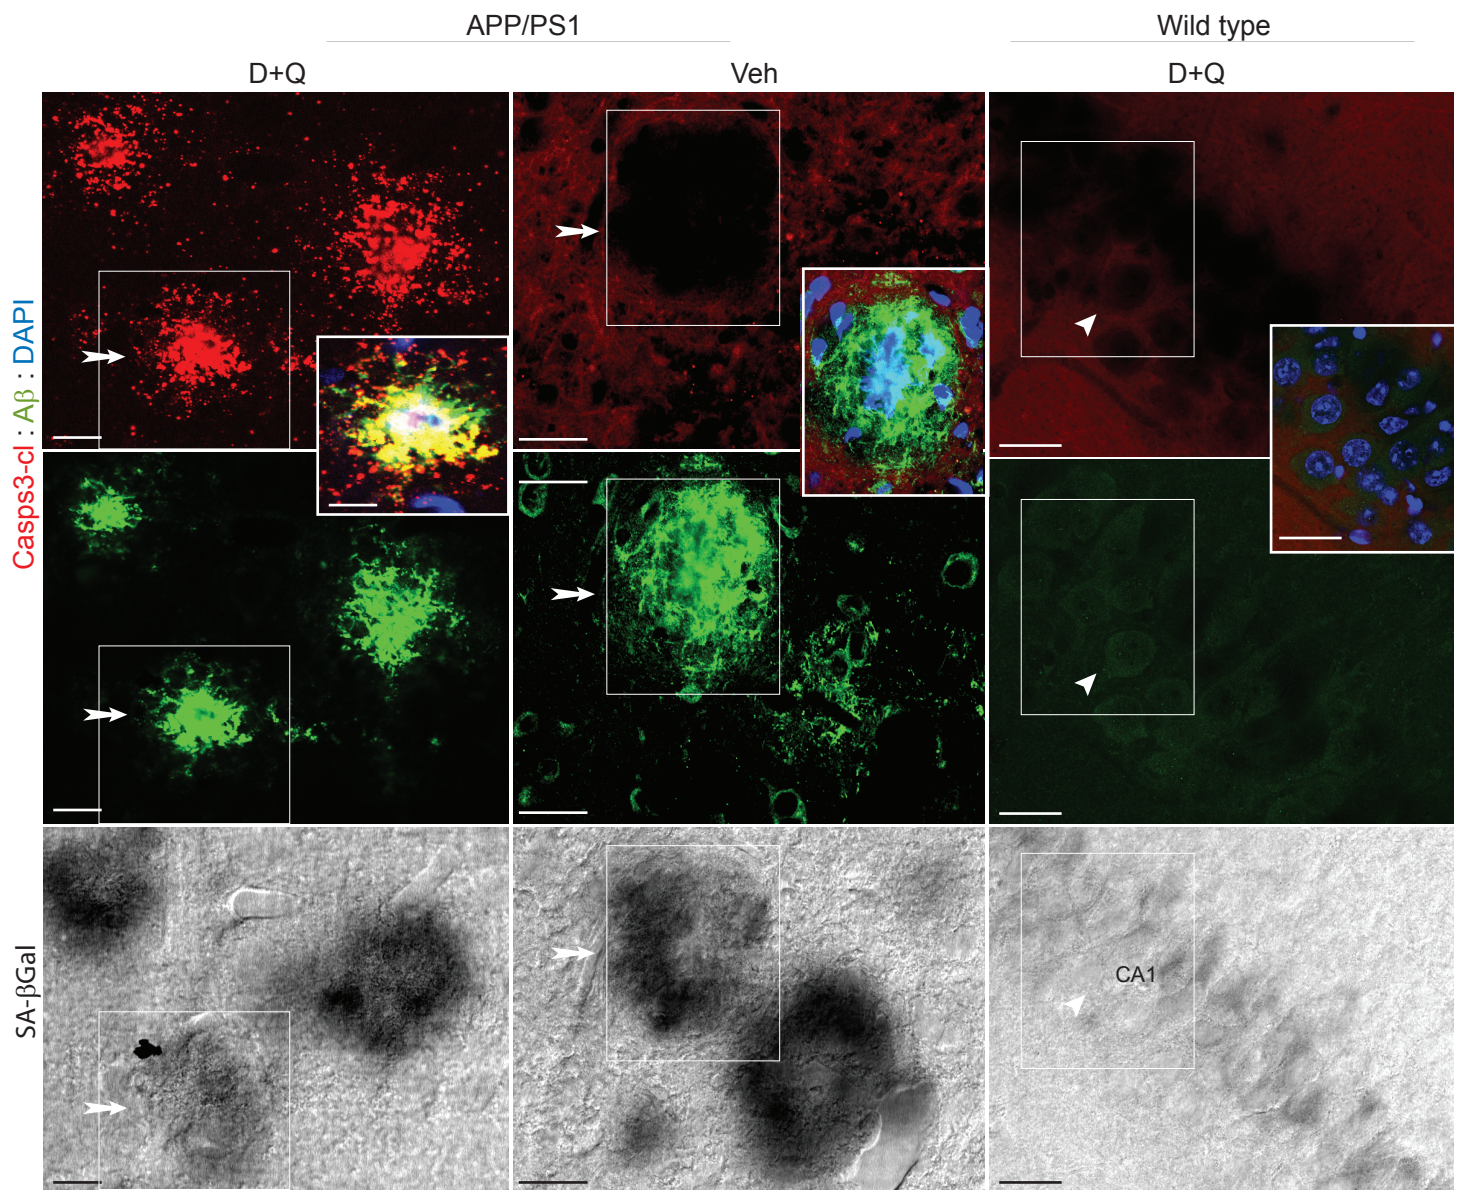

**Supplementary Figure 18.** Short-term D+Q treatment elicits a senolytic response in the brains of APP/PS1 mutant mice. The 8-month-old APP/PS1 mice and wild type littermates were administered either D+Q or vehicle daily for 9 d. Left, representative confocal images showing that the activation and cleavage of Caspase 3 (clv. Caps 3) indicative of apoptosis were observed in the brains of D+Q treated APP/PS1 mice. Arrows point to the immunoreactivity of clv. Casp 3 (red) were colocalized with A $\beta$  plaques (green) and SA- $\beta$ Gal foci (black). n=4. brains. Middle, clv. Casp 3 immunoreactivity was absent in A $\beta$  plaques and SA- $\beta$ Gal foci in the vehicle-treated APP/PS1 mouse brains. n=4 brains. Right, little or no caspase 3 activation was detected in the D+Q treated wild type mouse brains, where CA1 pyramidal neurons (arrowhead) exhibited diffuse SA- $\beta$ Gal activity. n=2 brains. The inserts at the right of each upper panel are merged fluorescence images of the boxed areas. Scale bar = 20  $\mu$ m. The images represent 12-15 images collected from 5 section of two brains in each group.

ZsGreen : GFAP : A $\beta$  : DAPI

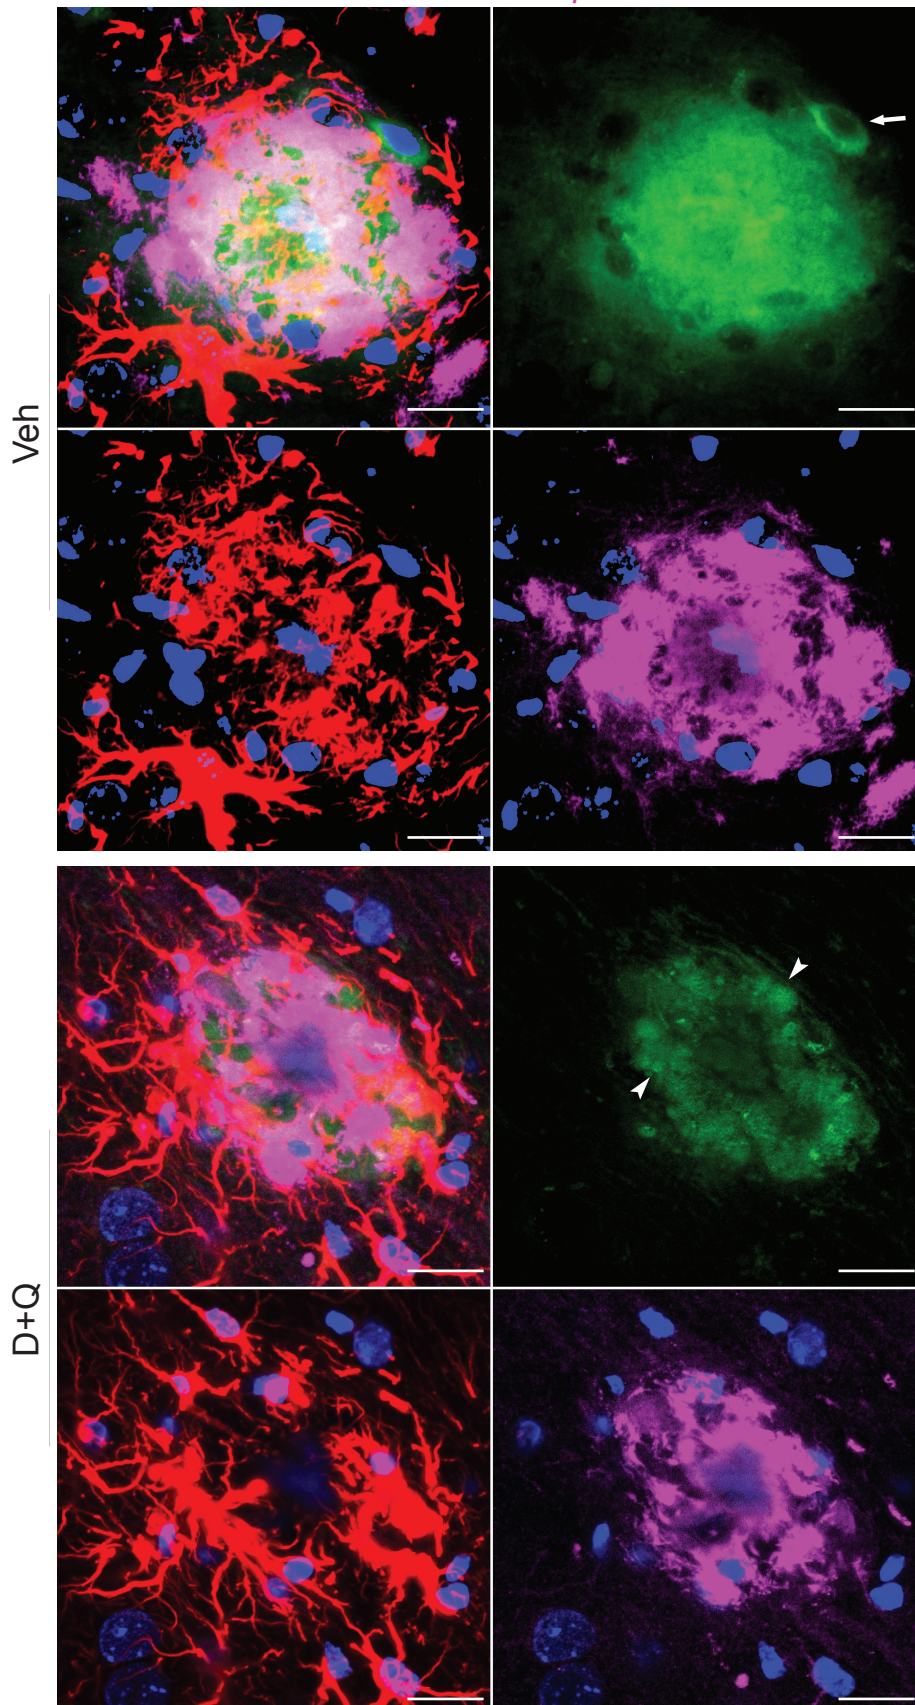

**Supplementary Figure 19.** Reduction of plaque-associated ZsGreen p16 reporter levels in response to D+Q treatment has little or no impact on A $\beta$ -associated astrocyte activation. ZsGreen/APPPS1 mice (5 months-old) were treated for 9 days with either vehicle (upper panel) or D+Q (lower panel). The images show ZsGreen (green) and astrocytes (red) in the A $\beta$  (purple) environment. Scale bar = 20  $\mu$ m. The images represent 12-15 images per group. n = 3 mouse brains in each group.

ZsGreen : Iba1 : IL-6 : FSB : DAPI

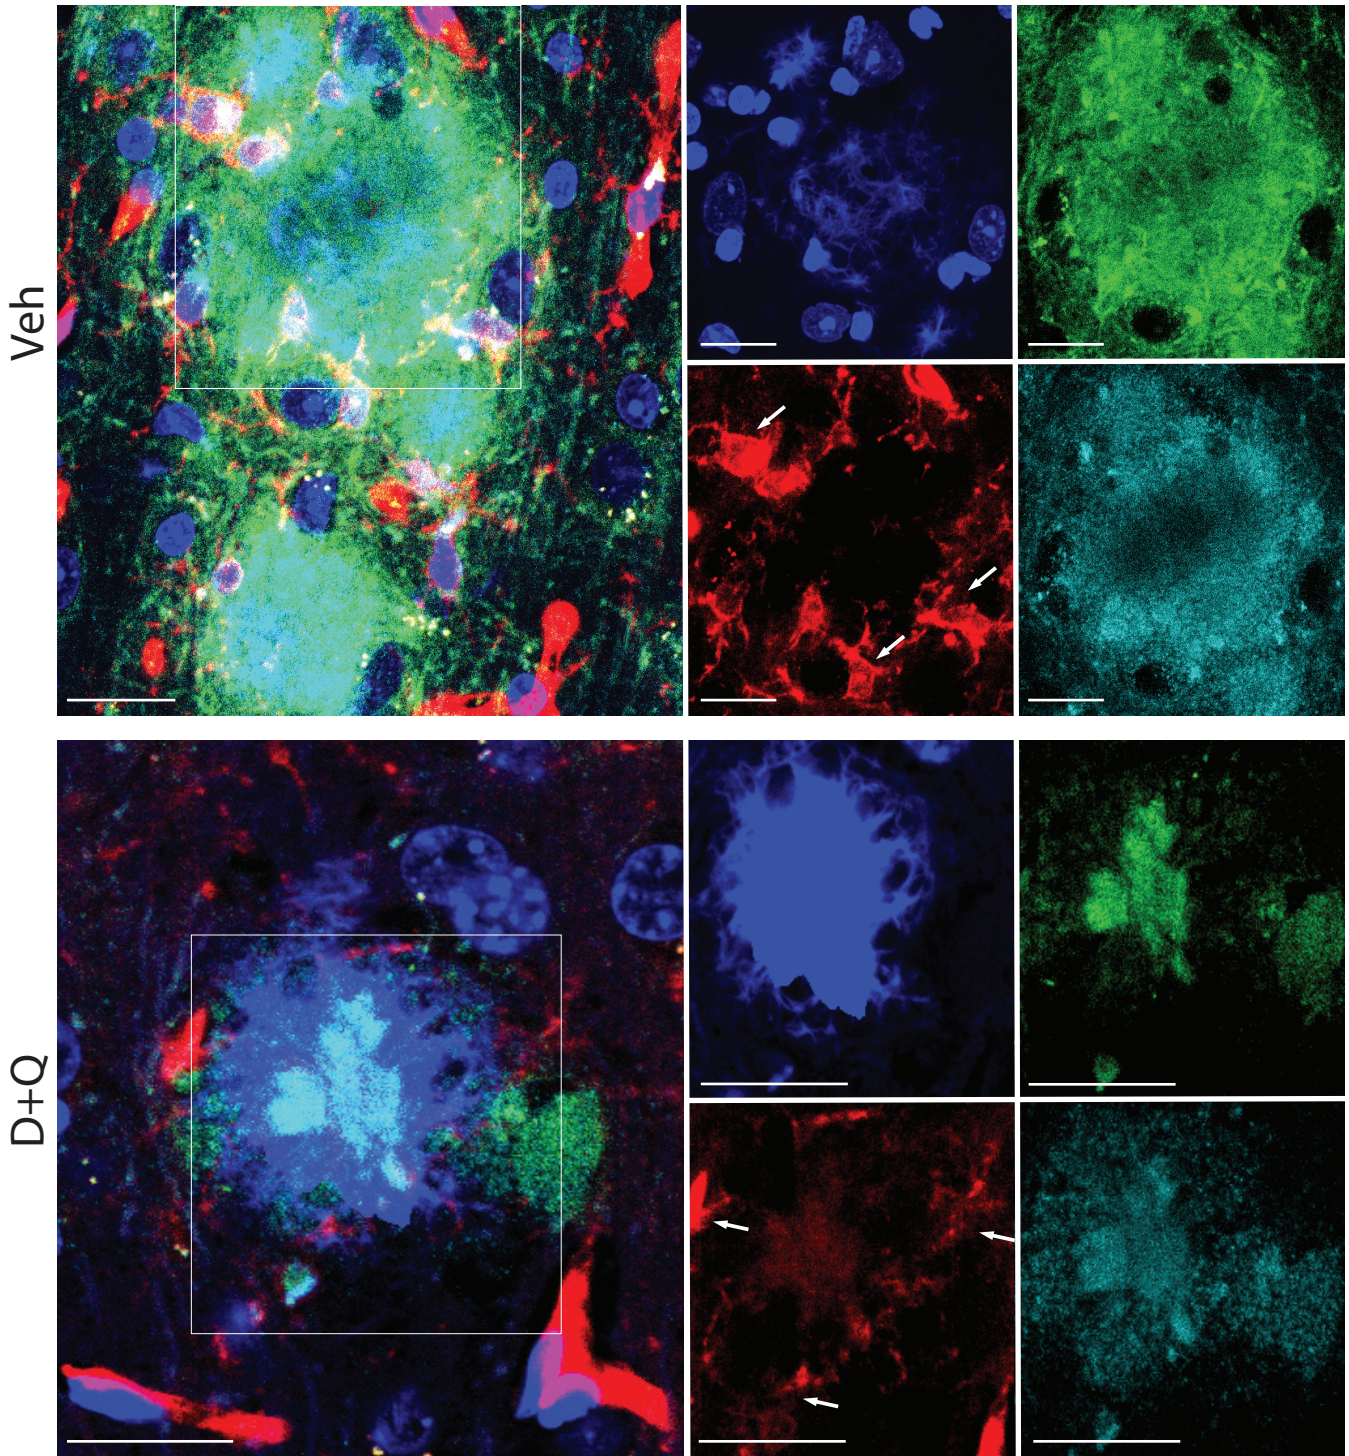

**Supplementary Figure 20.** Evidence that short-term senolytic treatment reduces A $\beta$  plaque-associated inflammation in APP/PS1 AD mice. ZsGreen/APPPS1 mice (5 months old) were treated for 9 days with either vehicle (upper panel) or with D+Q (lower panel). Images show ZsGreen p16 reporter fluorescence (green), Iba1-labeled microglia (red) and IL-6 immunoreactivity (cyan) in FSB labeled A $\beta$  plaques. Inserts in right panels are unmerged images in the boxed areas. Arrows point to reactive (upper panel) and dereactive microglia (lower panel) in response to vehicle and (D+Q)S treatments respectively. Scale bar =20  $\mu$ m. The images represent 12-15 plaques per mouse and n=3 biological replicates per group.

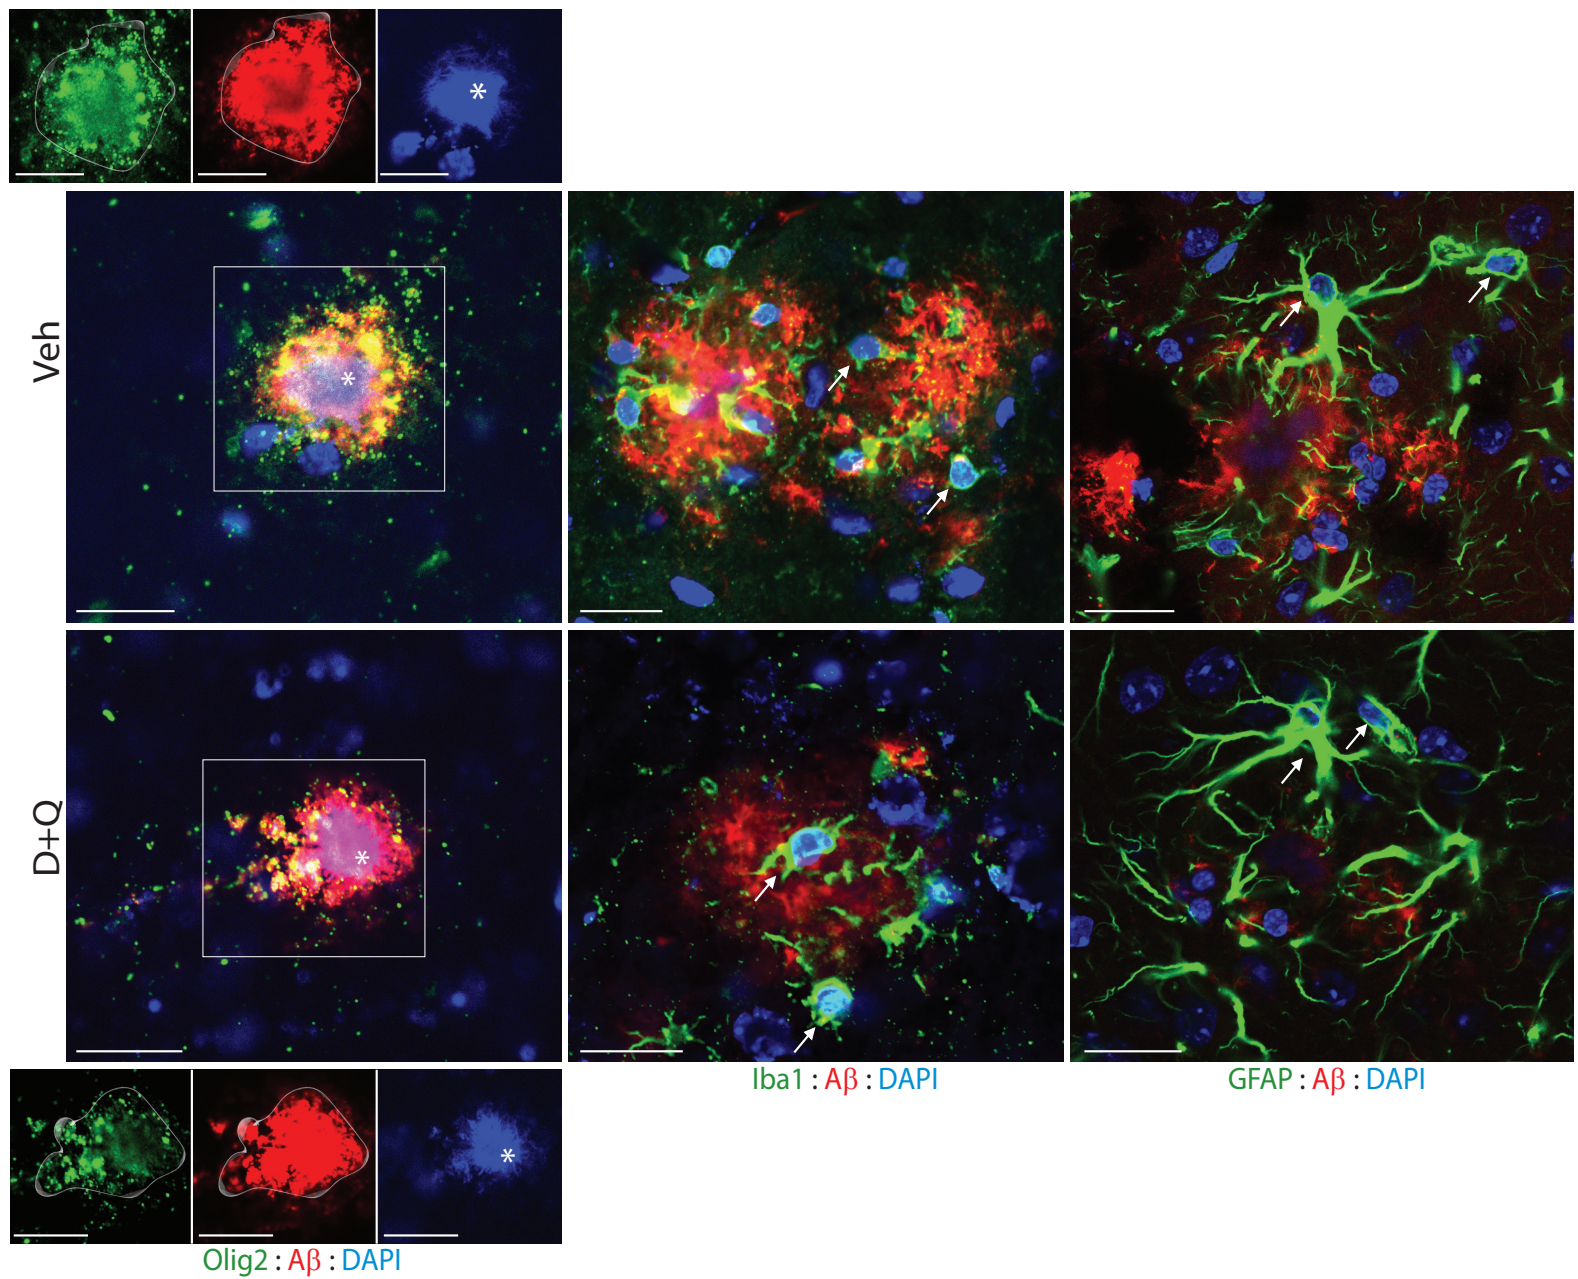

**Supplementary Figure 21.** Examples of A $\beta$  plaque-associated cells in APP/PS1 AD mice treated for 11 weeks with vehicle or D+Q. Brain sections were immunostained with antibodies against Olig2 (green in left panel), Iba1 (green in middle panel) and GFAP (green in right panel). The A $\beta$  plaque (red)-associated fluorescence Olig2 fluorescence intensity (lasso enclosure in unmerged insert), and the number of GFAP-, Iba1-positive cells (arrows) were quantified and those data are shown in Fig. 5b. Asterisks in leftmost panels mark DAPI-stained nuclei in the plaque environment. Scale bar = 20  $\mu$ m. The images represent 10-18 images per mouse brain. n = 6 and 8 mice for Veh control and D+Q treatment, respectively.

**Supplemental table 1:** Demographics and characteristics of postmortem examined individuals

| Reference<br>(no) | Clinical<br>Diagnosis | Age<br>(years) | Gender<br>(M/F) | Braak<br>Stage | PMD  | A $\beta$ plaques <sup>a</sup> |     | p21&Olig2/A $\beta$ <sup>b</sup> |     |
|-------------------|-----------------------|----------------|-----------------|----------------|------|--------------------------------|-----|----------------------------------|-----|
|                   |                       |                |                 |                |      | Total                          | AVG | Total                            | AVG |
| 1244              | NDC                   | 90             | F               | 2              | 2.25 | 2*                             | 0.4 | 1                                | 0.2 |
| 1245              | NDC                   | 88             | M               | 2              | 2.17 | 45                             | 2.3 | 18                               | 0.9 |
| 1280              | NDC                   | 86             | M               | 2              | 4    | 2*                             | 0.4 | 1                                | 0.2 |
| 1161              | NDC                   | 84             | F               | 0              | 2.5  | 0*                             | 0.0 | 0                                | 0.0 |
| 1221              | NDC                   | 81             | M               | 2              | 2.83 | 40                             | 1.9 | 23                               | 1.1 |
| 1260              | NDC                   | 80             | F               | 1              | 4.42 | 6*                             | 0.6 | 0                                | 0.2 |
| 1271              | NDC                   | 71             | M               | 0              | 2.6  | 18*                            | 1.8 | 3                                | 0.3 |
| 1268              | NDC                   | 68             | F               | 1              | 4    | 5*                             | 0.5 | 3                                | 0.3 |
| 1289              | MCI                   | 92             | F               | 3              | 2.33 | 93                             | 3.1 | 45                               | 1.5 |
| 1164              | MCI                   | 88             | F               | 3              | 3    | 84                             | 4.0 | 53                               | 2.5 |
| 1122              | MCI                   | 87             | M               | 4              | 2.75 | 0*                             | 0.0 | 0                                | 0.0 |
| 1065              | MCI                   | 87             | M               | 4              | 3.5  | 68                             | 3.6 | 42                               | 2.2 |
| 1152              | MCI                   | 84             | M               | 4              | 3.5  | 61                             | 3.1 | 23                               | 1.2 |
| 1225              | MCI                   | 82             | F               | 5              | 5    | 75                             | 3.6 | 47                               | 2.2 |
| 1087              | MCI                   | 82             | F               | 3              | 3    | 29                             | 2.9 | 11                               | 1.1 |
| 1277              | MCI                   | 78             | F               | 3              | 3.5  | 80                             | 4.0 | 16                               | 0.8 |
| 1086              | AD                    | 90             | F               | 6              | 2.75 | 64                             | 3.0 | 54                               | 2.6 |
| 1285              | AD                    | 88             | M               | 5              | 1.5  | 111                            | 5.6 | 100                              | 5.0 |
| 1084              | AD                    | 86             | F               | 6              | 3.25 | 108                            | 5.4 | 104                              | 5.2 |
| 1144              | AD                    | 85             | M               | 6              | 2.75 | 79                             | 4.9 | 64                               | 4.0 |
| 1050              | AD                    | 81             | M               | 6              | 3.75 | 67                             | 3.5 | 53                               | 2.8 |
| 1202              | AD                    | 80             | F               | 6              | 3.33 | 83                             | 4.2 | 48                               | 2.4 |
| 1160              | AD                    | 73             | M               | 6              | 2    | 96                             | 4.4 | 75                               | 3.4 |
| 1181              | AD                    | 67             | F               | 6              | 2.25 | 161                            | 8.1 | 153                              | 7.7 |

NDC: non-demented controls

MCI: mild cognitive impairment

Braak stage: scored by the existence of neurofibrillary tangles

PMD: post modern delay

a: scored by the gray matter of cortex (inferior parietal lobule) with A $\beta$  plaque size  $\geq 50\mu\text{m}$

b: scored by one or more of p21+ / olig2+ positive granule(s) per A $\beta$  plaque

\* All cases were scored from more than 20 of 0.5mm<sup>2</sup> fields except NDC\* and MCI subject 1122 that were scored from 5 to 10 fields due leaking A $\beta$  plaque

**Supplementary table 2**

|    | Symb      | Forward              | Reverse                | Genbank #      | Gene name                                      |
|----|-----------|----------------------|------------------------|----------------|------------------------------------------------|
| 1  | hAPP      | CCCCAGATTGCCATGTTCTG | TGGATGGTCACTGGTTGGTT   | NM_000484.3    | *human amyloid beta A4 protein precursor       |
| 2  | mApp      | TGCAGCAGAACGGATATGAG | ACACCGATGGGTAGTGAAGC   | NM_001198823.1 | amyloid beta precursor protein                 |
| 3  | mPsen1    | TGGTTGGTGAATATGGCTGA | CTCCCACTCCTCACTGAAGC   | NM_008943.2    | presenilin 1                                   |
| 4  | mMapt     | GCCCTCTGGCCTTCTGTAG  | AGACGTGGGCATGATAGGAC   | NM_001038609.2 | microtubule associated protein tau             |
| 5  | mNotch1   | ACCCACTCTGTCTCCACAC  | GCTTCCTTGCTACCACAAGC   | NM_008714.3    | Notch1                                         |
| 6  | mBace2    | TCTTTGTGCGGATGTCTCAG | ACATTCTGGATGGCTCTTG    | NM_019517.4    | beta-site APP-cleaving enzyme 2                |
| 7  | mCspg4    | ATTCAAGCACGCTCTGTTCT | GACCAACAAGGCCAAGGTAA   | NM_139001.2    | chondroitin sulfate proteoglycan 4 (NG2)       |
| 8  | mOlig2    | AGCAATGGGAGCATTGAAG  | CAGGAAGTCCAGGGATGAA    | NM_016967.2    | oligodendrocyte transcription factor 2         |
| 9  | mOlig1    | GGTTTCCGAGCTGGATGTTA | GCGAGCCTGAAAAACAGAAC   | NM_016968.4    | oligodendrocyte transcription factor 1         |
| 10 | mPdgfra   | ACCACAATGGTGTGTTGAA  | AATCTCTGGGGCAAAGGTCT   | NM_001083316.1 | platelet derived growth factor receptor alpha  |
| 11 | Mbp       | CCTCTGCCCTCTCATGCC   | CCATAATGGGTAGTTCTCGTGT | NM_001025251.2 | myelin basic protein                           |
| 12 | mCdkn1a   | CACAGCTCAGTGGACTGGAA | ACCCTAGACCCACAATGCAG   | NM_001111099.2 | cyclin-dependent kinase inhibitor 1A , p21CIP1 |
| 13 | mCdkn2a   | ATCTGGAGCAGCATGGAGTC | GGGGTACGACCGAAAGAGTT   | NM_001040654.1 | cyclin-dependent kinase inhibitor 2AP16INK4A   |
| 14 | mCdkn1c   | AGAGAACTGCGCAGGAGAAC | TCTGGCCGTTAGCCTCTAAA   | NM_001161624.1 | cyclin-dependent kinaseinhibitor,p57KIP2       |
| 15 | mTgfb1    | GGACTCTCACCTGCAAGAC  | GACTGGCGAGCCTTAGTTTG   | NM_011577.2    | transforming growth factor beta 1              |
| 16 | IL-1beta  | ACTCATTGTGGCTGTGGAGA | TTGTTTCTCGGAGCCTGT     | NM_008361.4    | interleukin 1 beta                             |
| 17 | Tnfbalpha | CCACCACGCTCTTCTGTCTA | CTGATGAGAGGGAGGCCATT   | NM_013693.3    | tumor necrosis factor isoform1                 |
| 18 | Rn18s     | GTAACCCGTTGAACCCATT  | CCATCCAATCGGTAGTAGCG   | NR_003278      | 18S ribosomal RNA                              |
| 19 | Actb      | TGTTACCAACTGGGACGACA | GGGGTGTGAAGGTCTCAA     | NM_007393.5    | Beta Actin                                     |
| 20 | Galc      | GAGGCTATGAGTGGTGGCTA | CTTTGCCAGCCATCCAG      | NM_008079.4    | galactocerebrosidase                           |

\*human transgene
